# Supplementary material for: Divergence Times and the Evolutionary Radiation of New World Monkeys (Platyrrhini, Primates): An Analysis of Fossil and Molecular Data
Source: PubMed Central journal article supplement (PMC3694915; doi:10.1371/journal.pone.0068029), 2013-06-27

# Nuclear

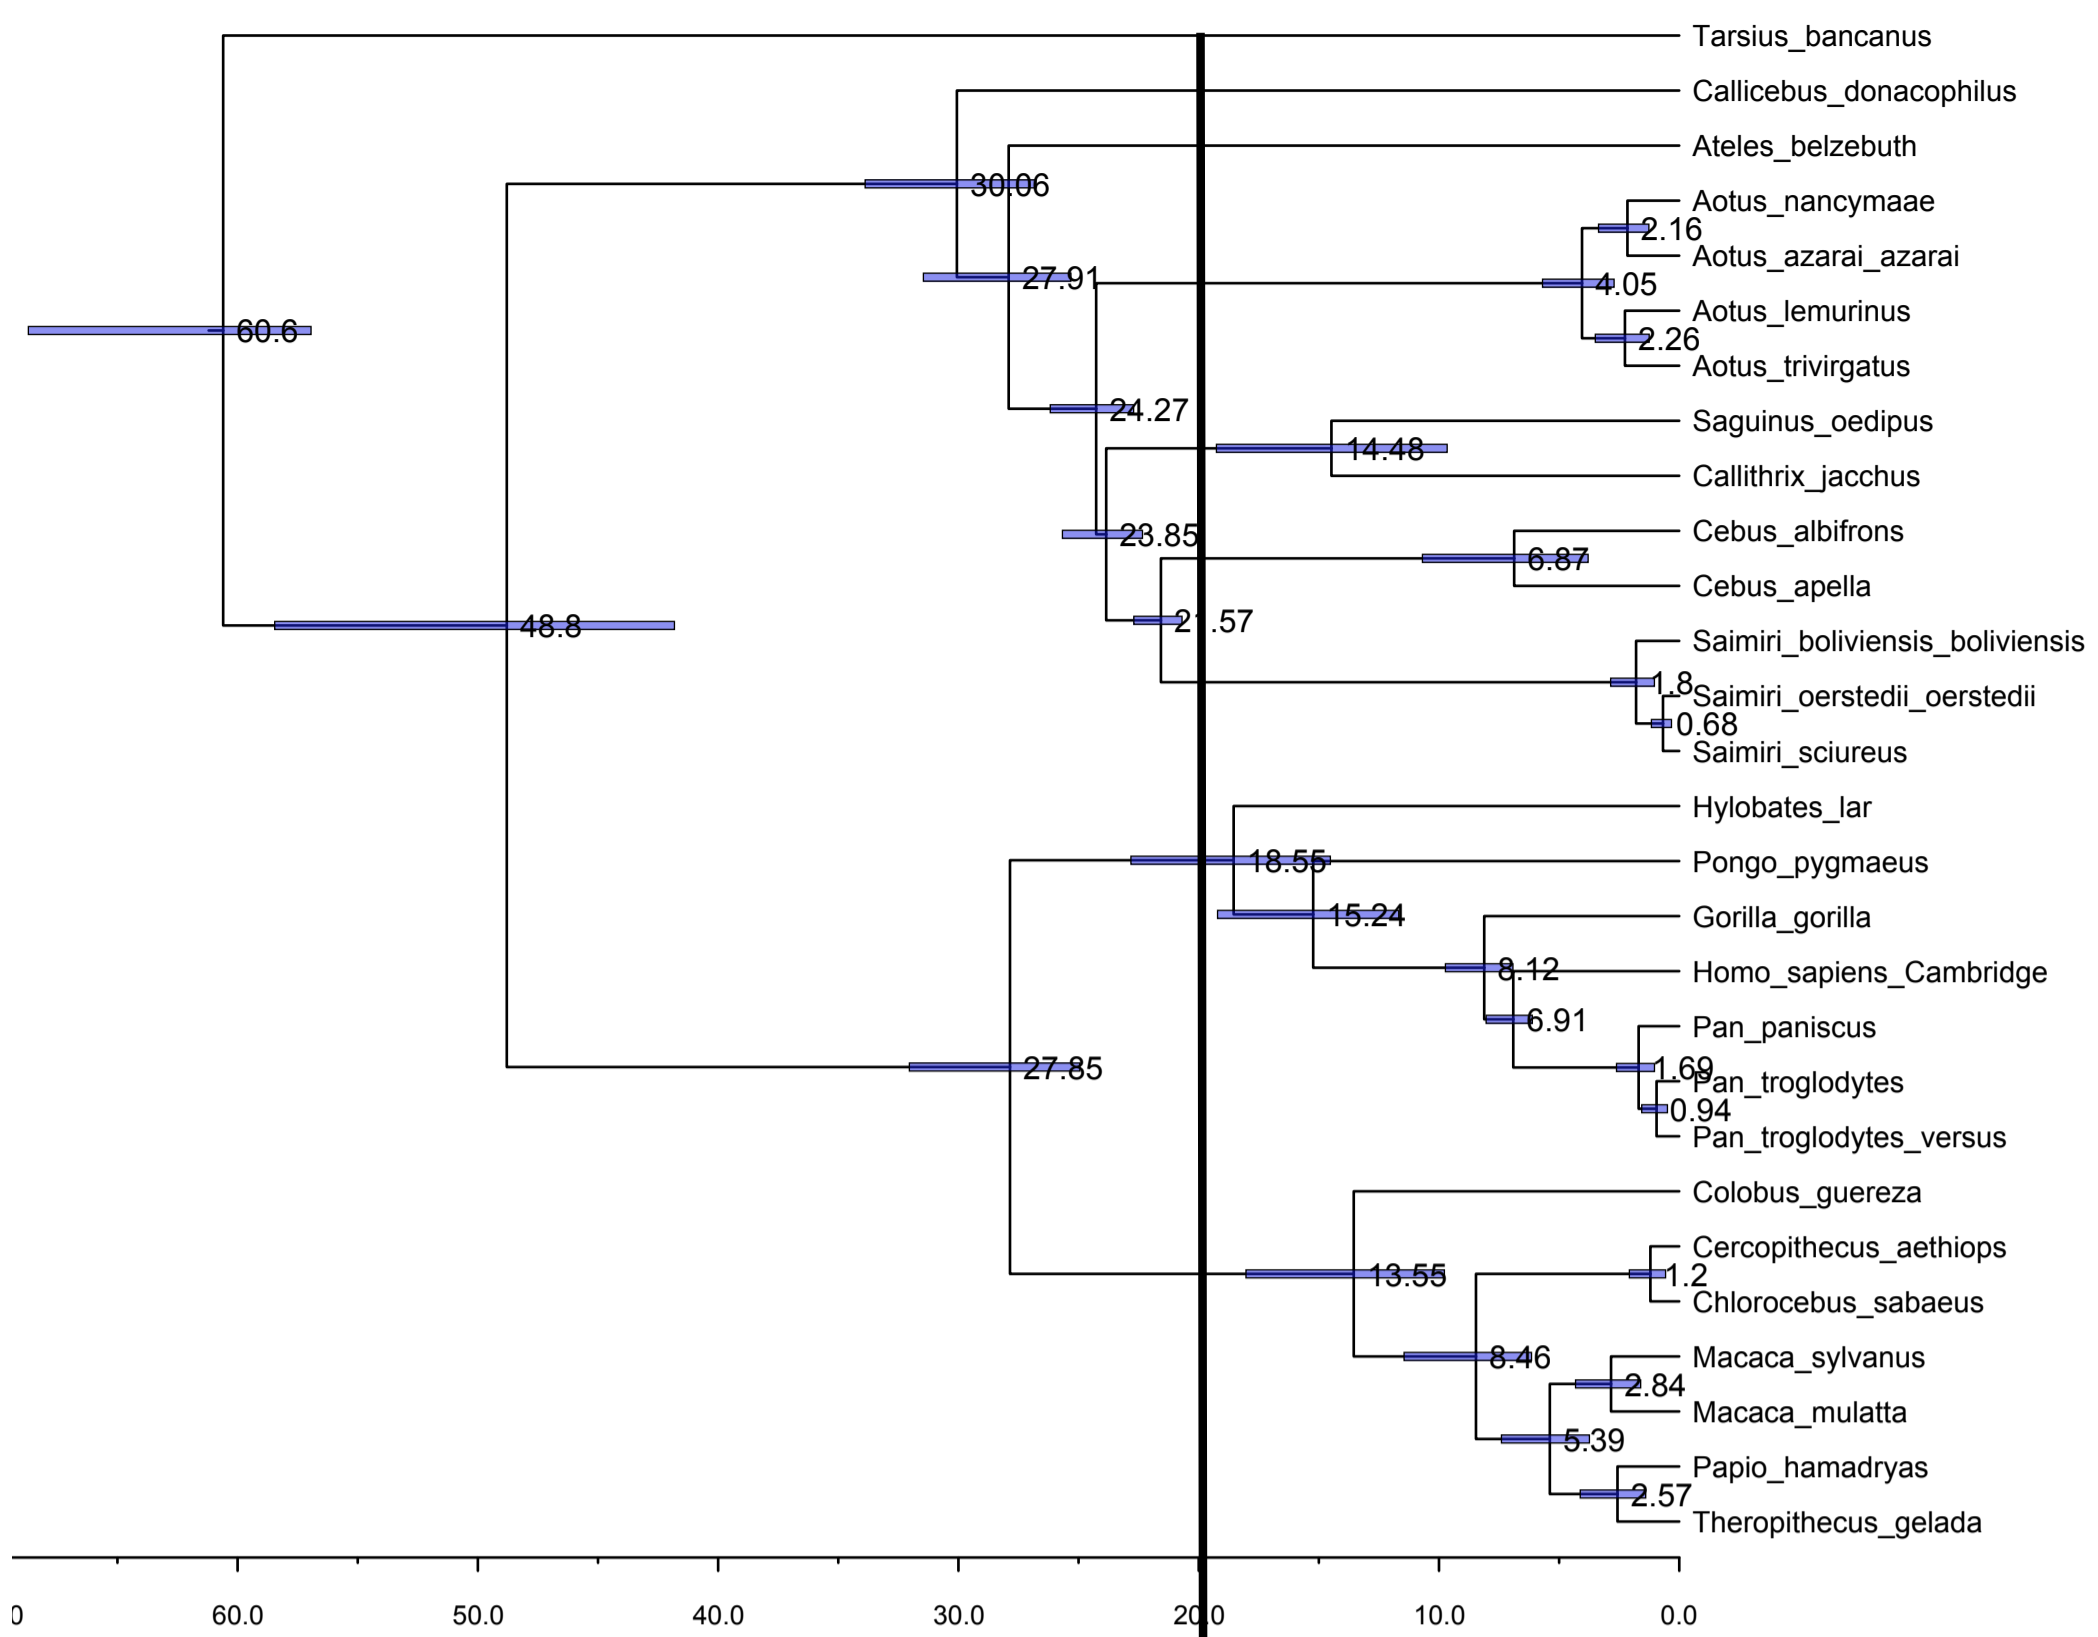

# mtDNA

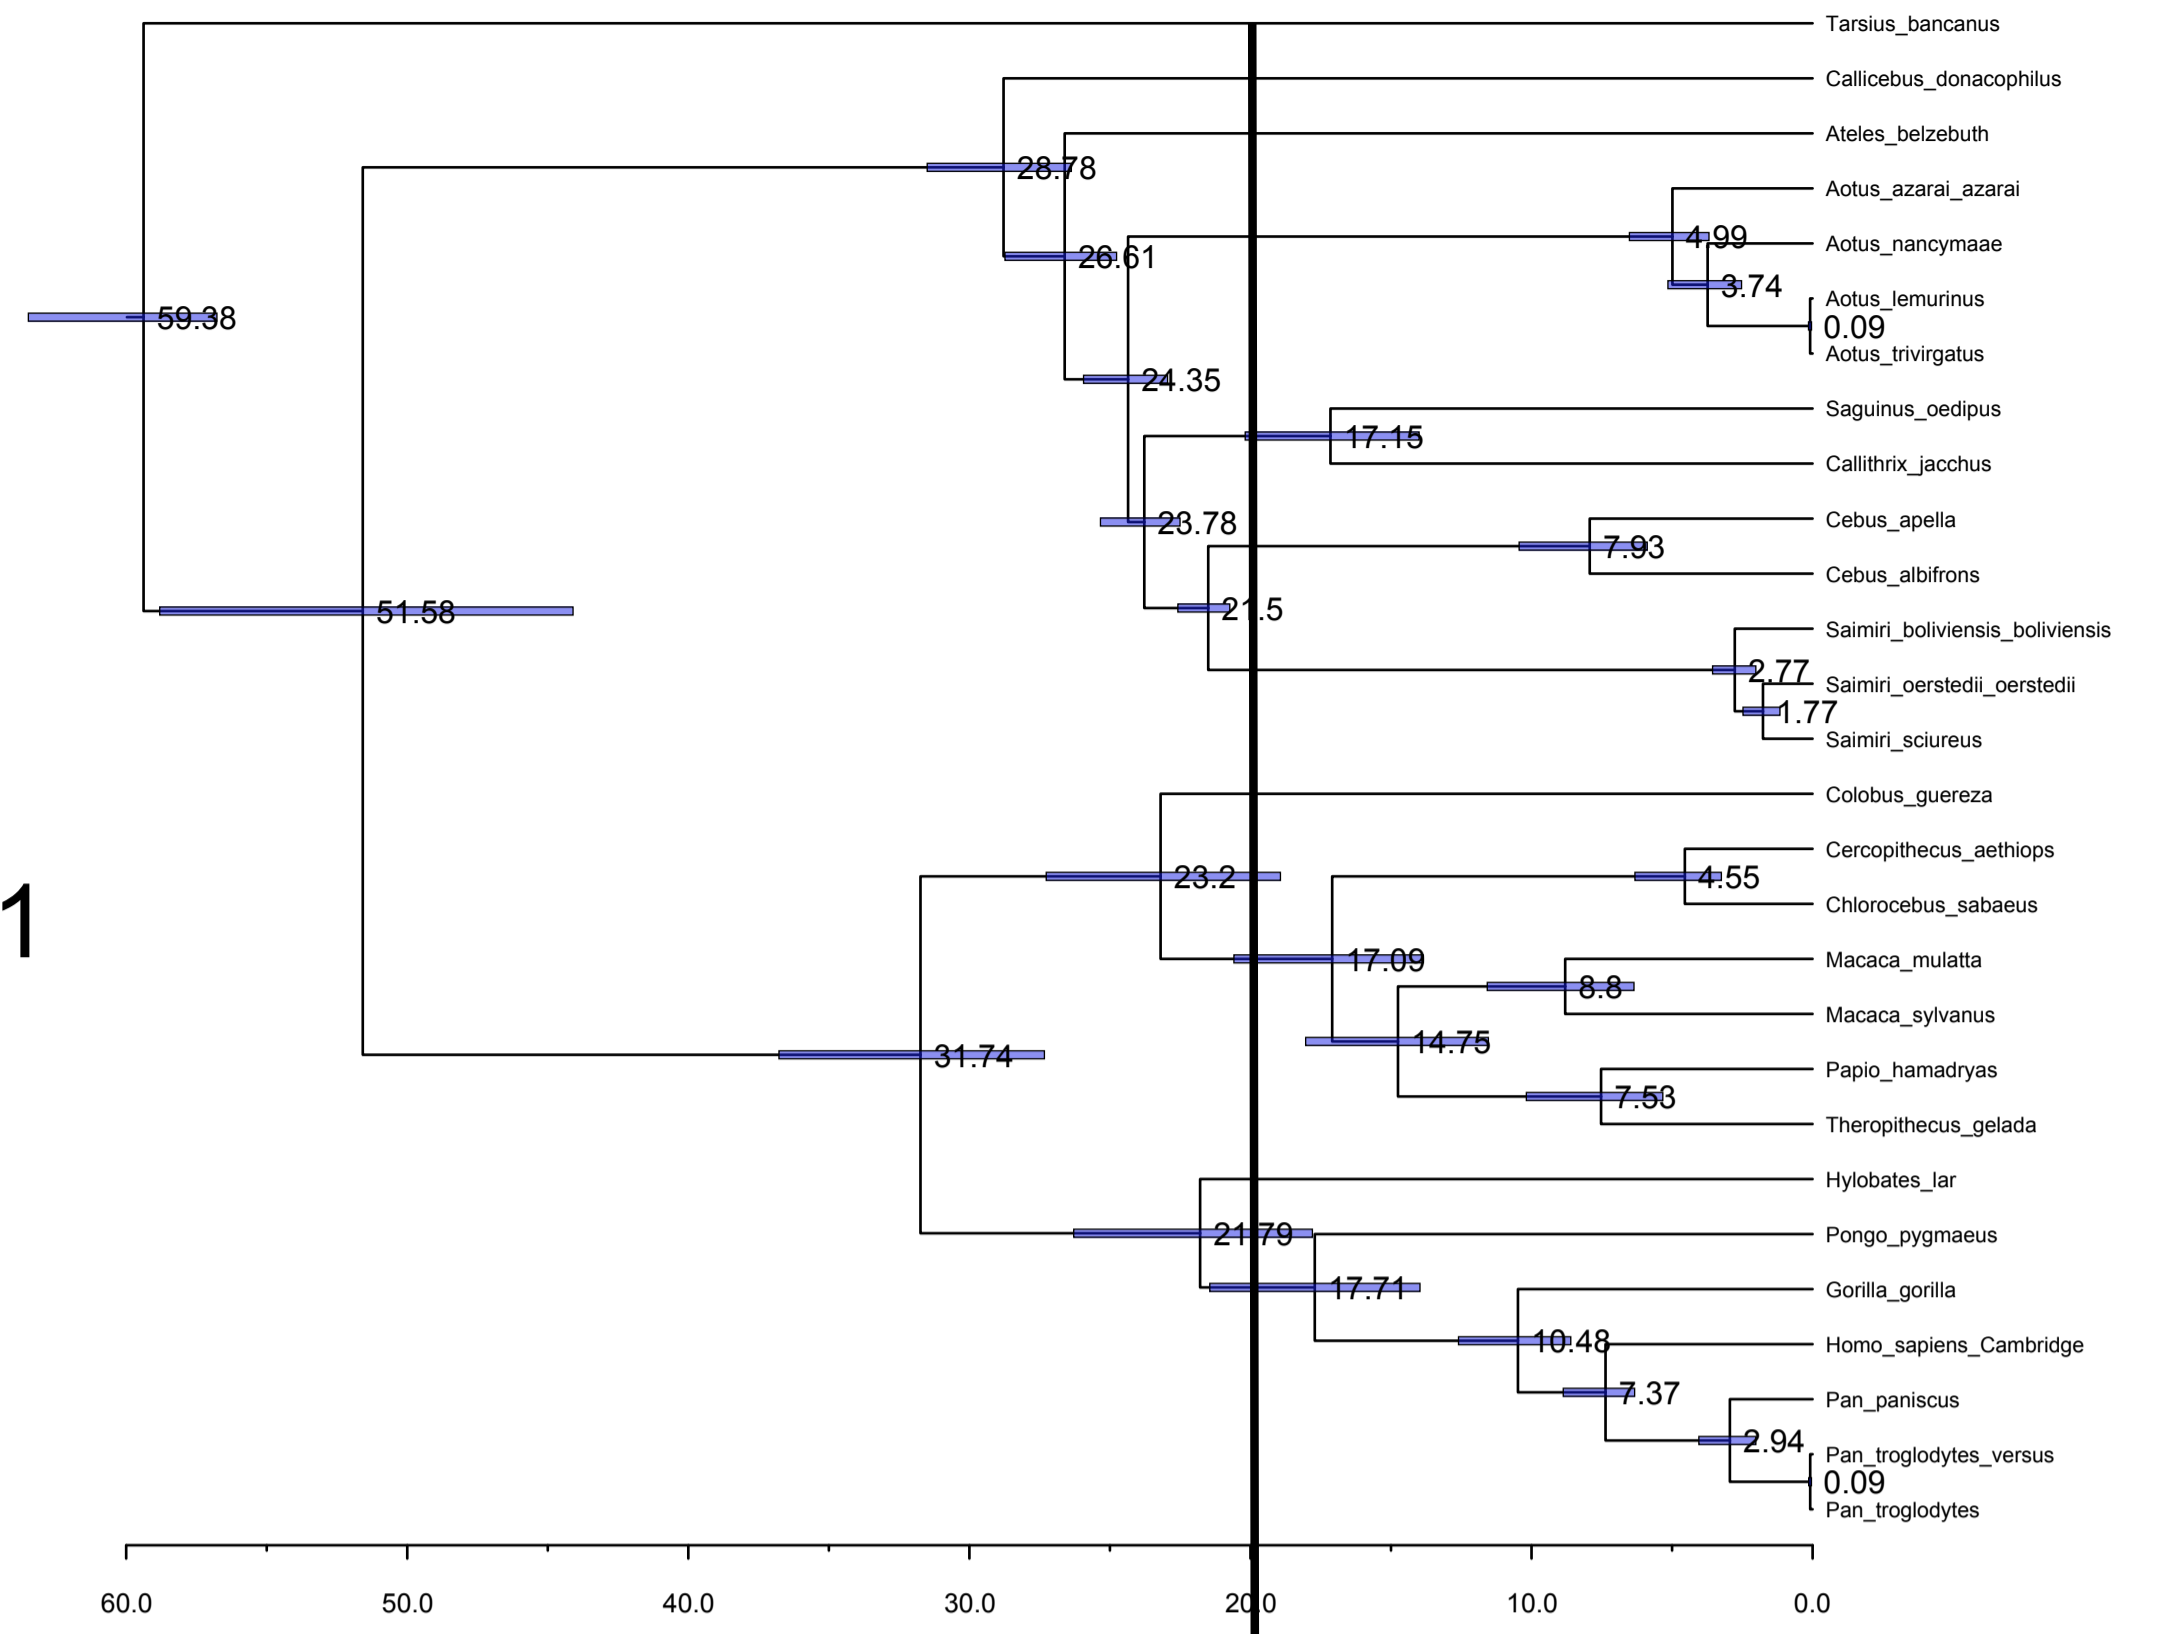

Hip 1

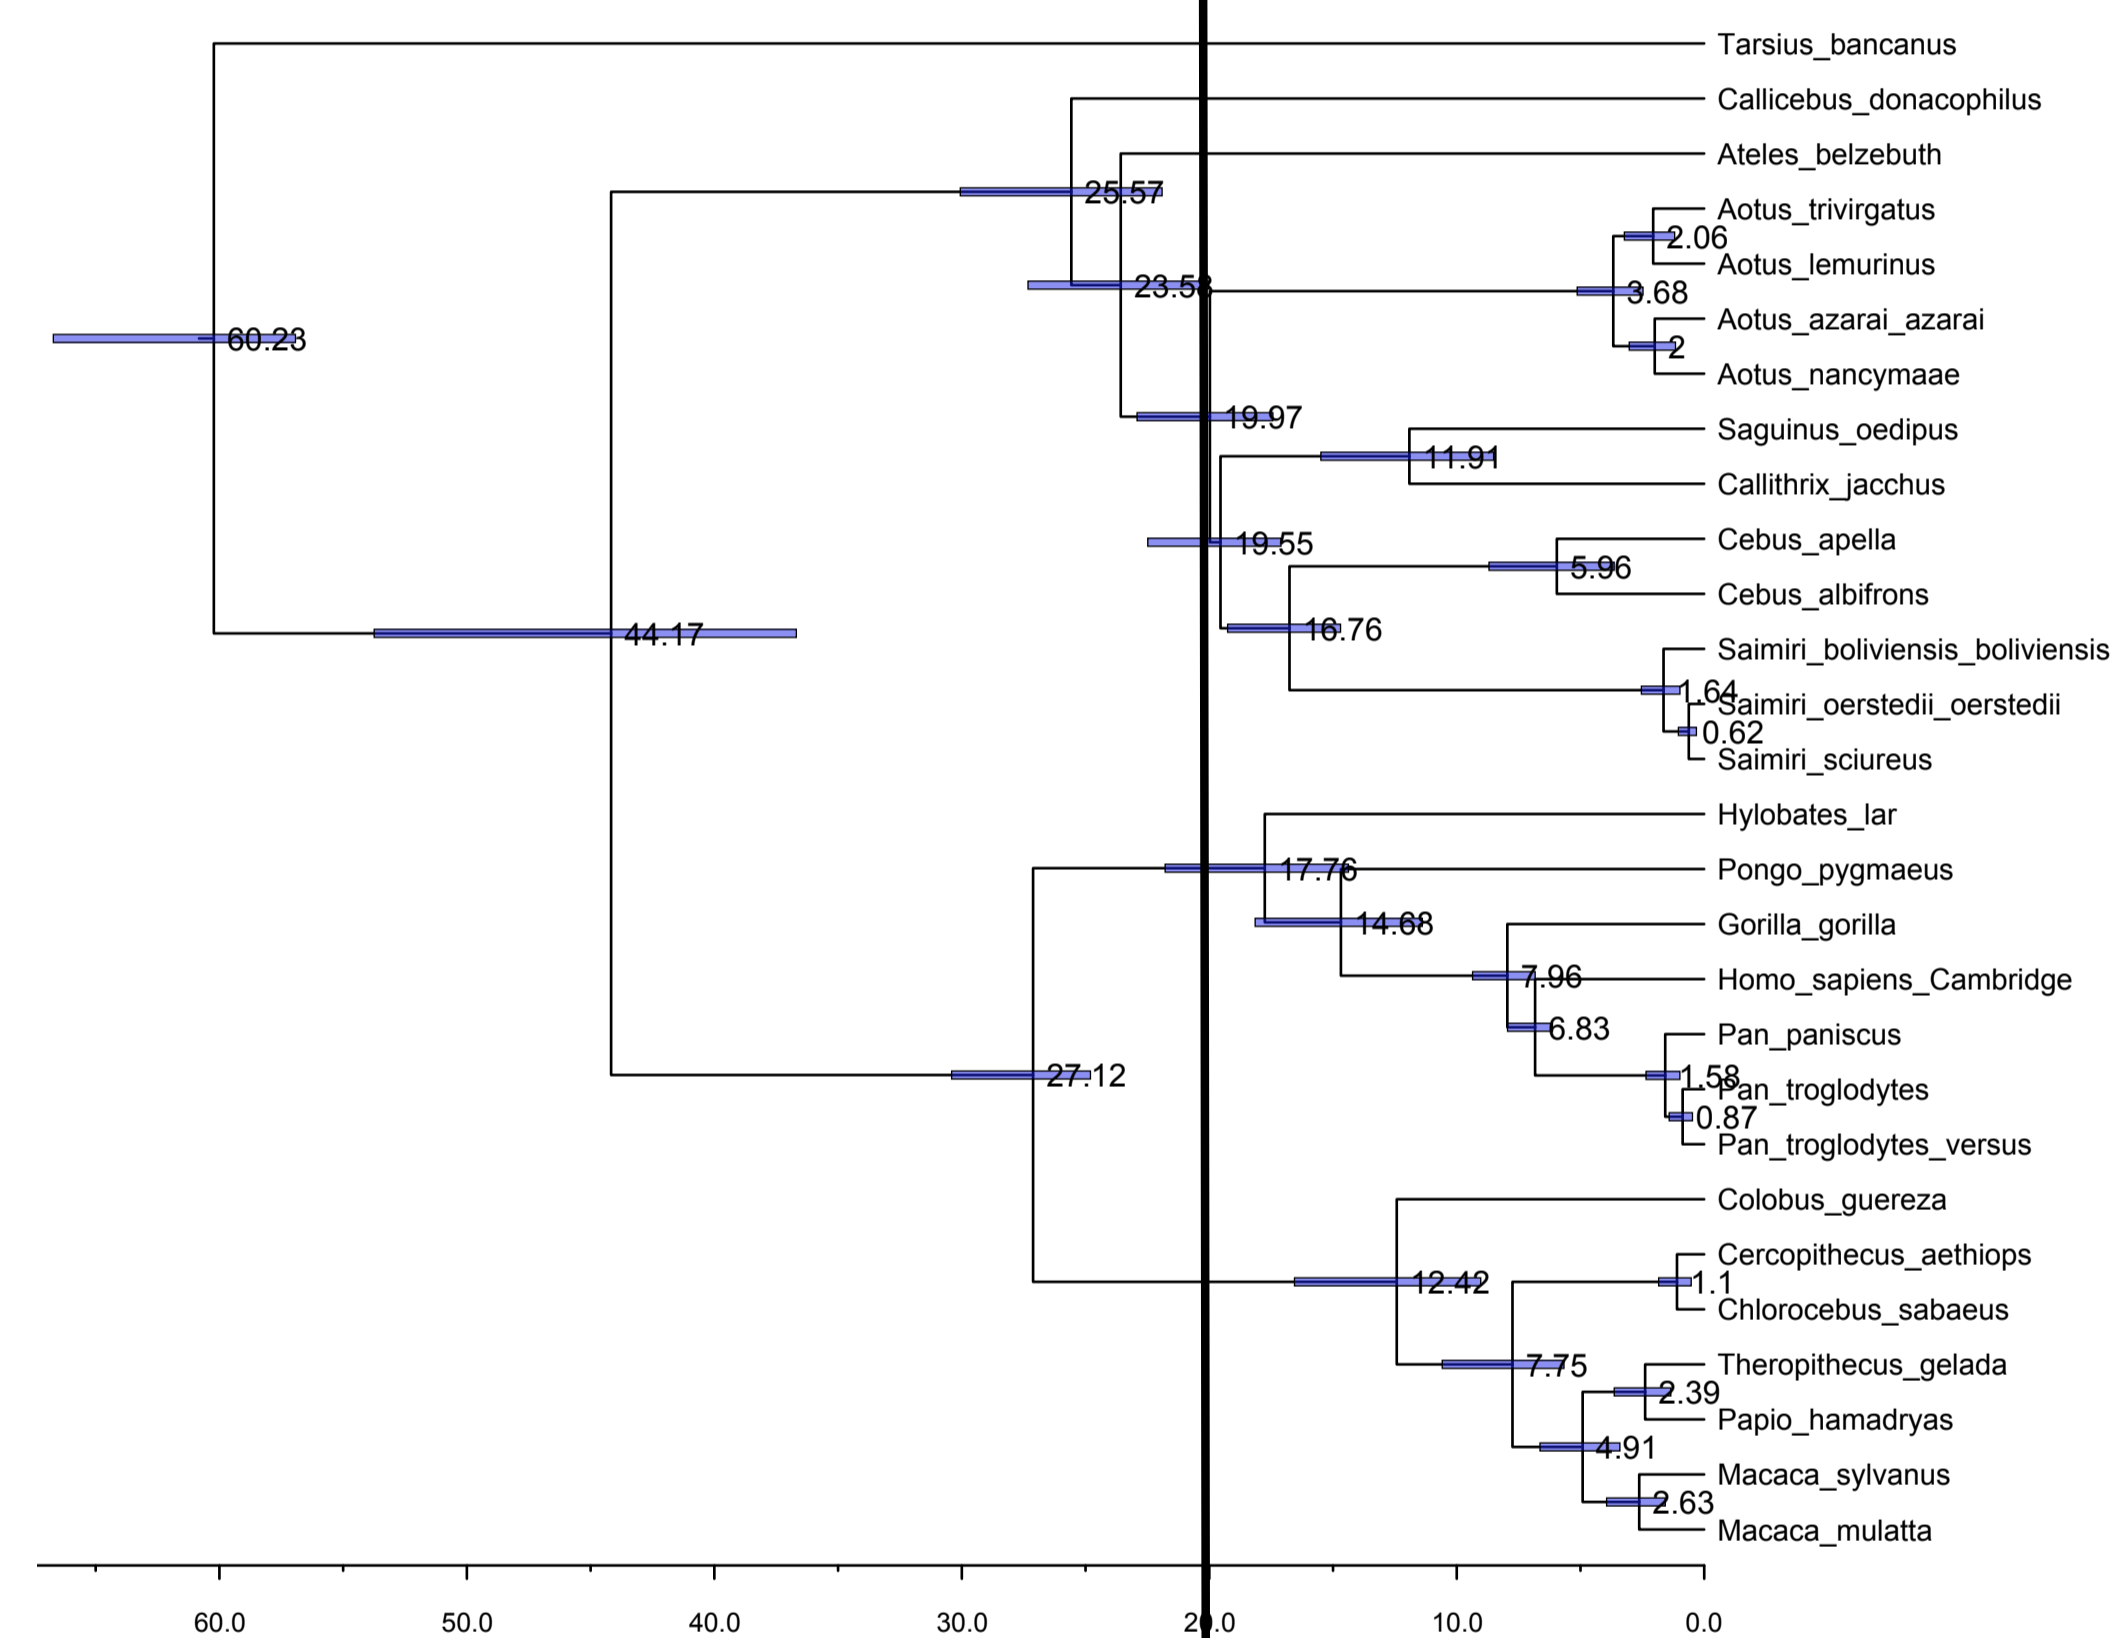

Hip 2

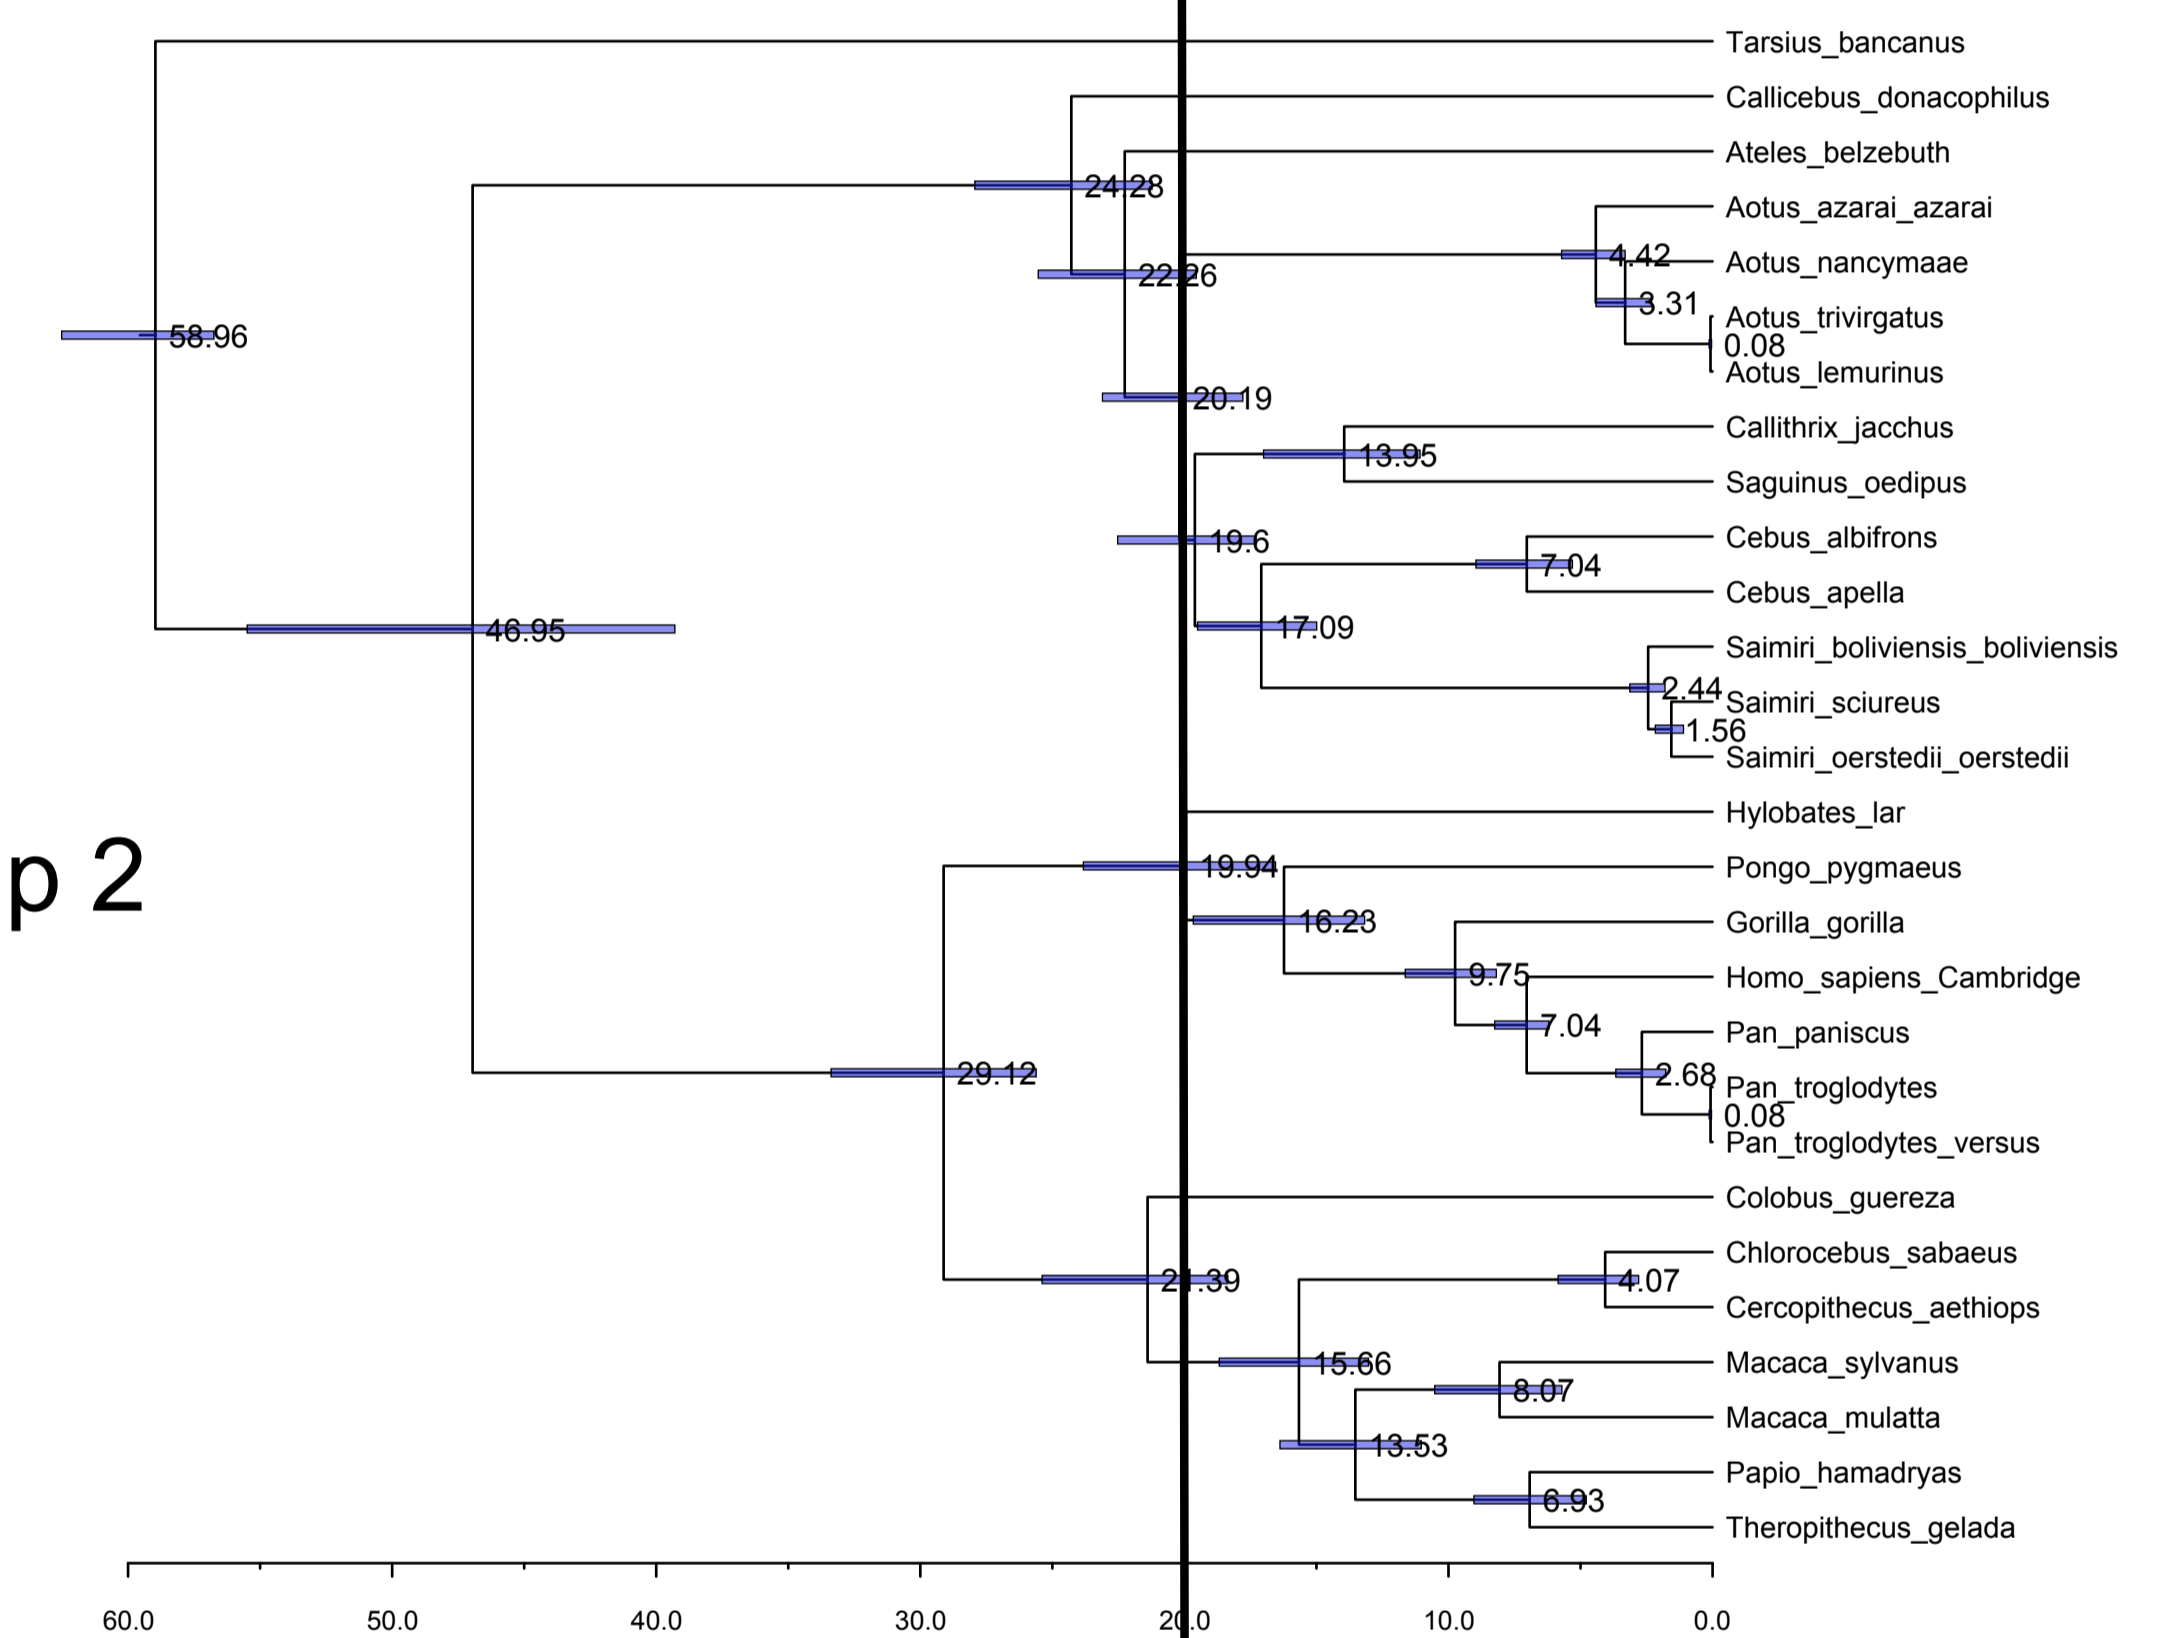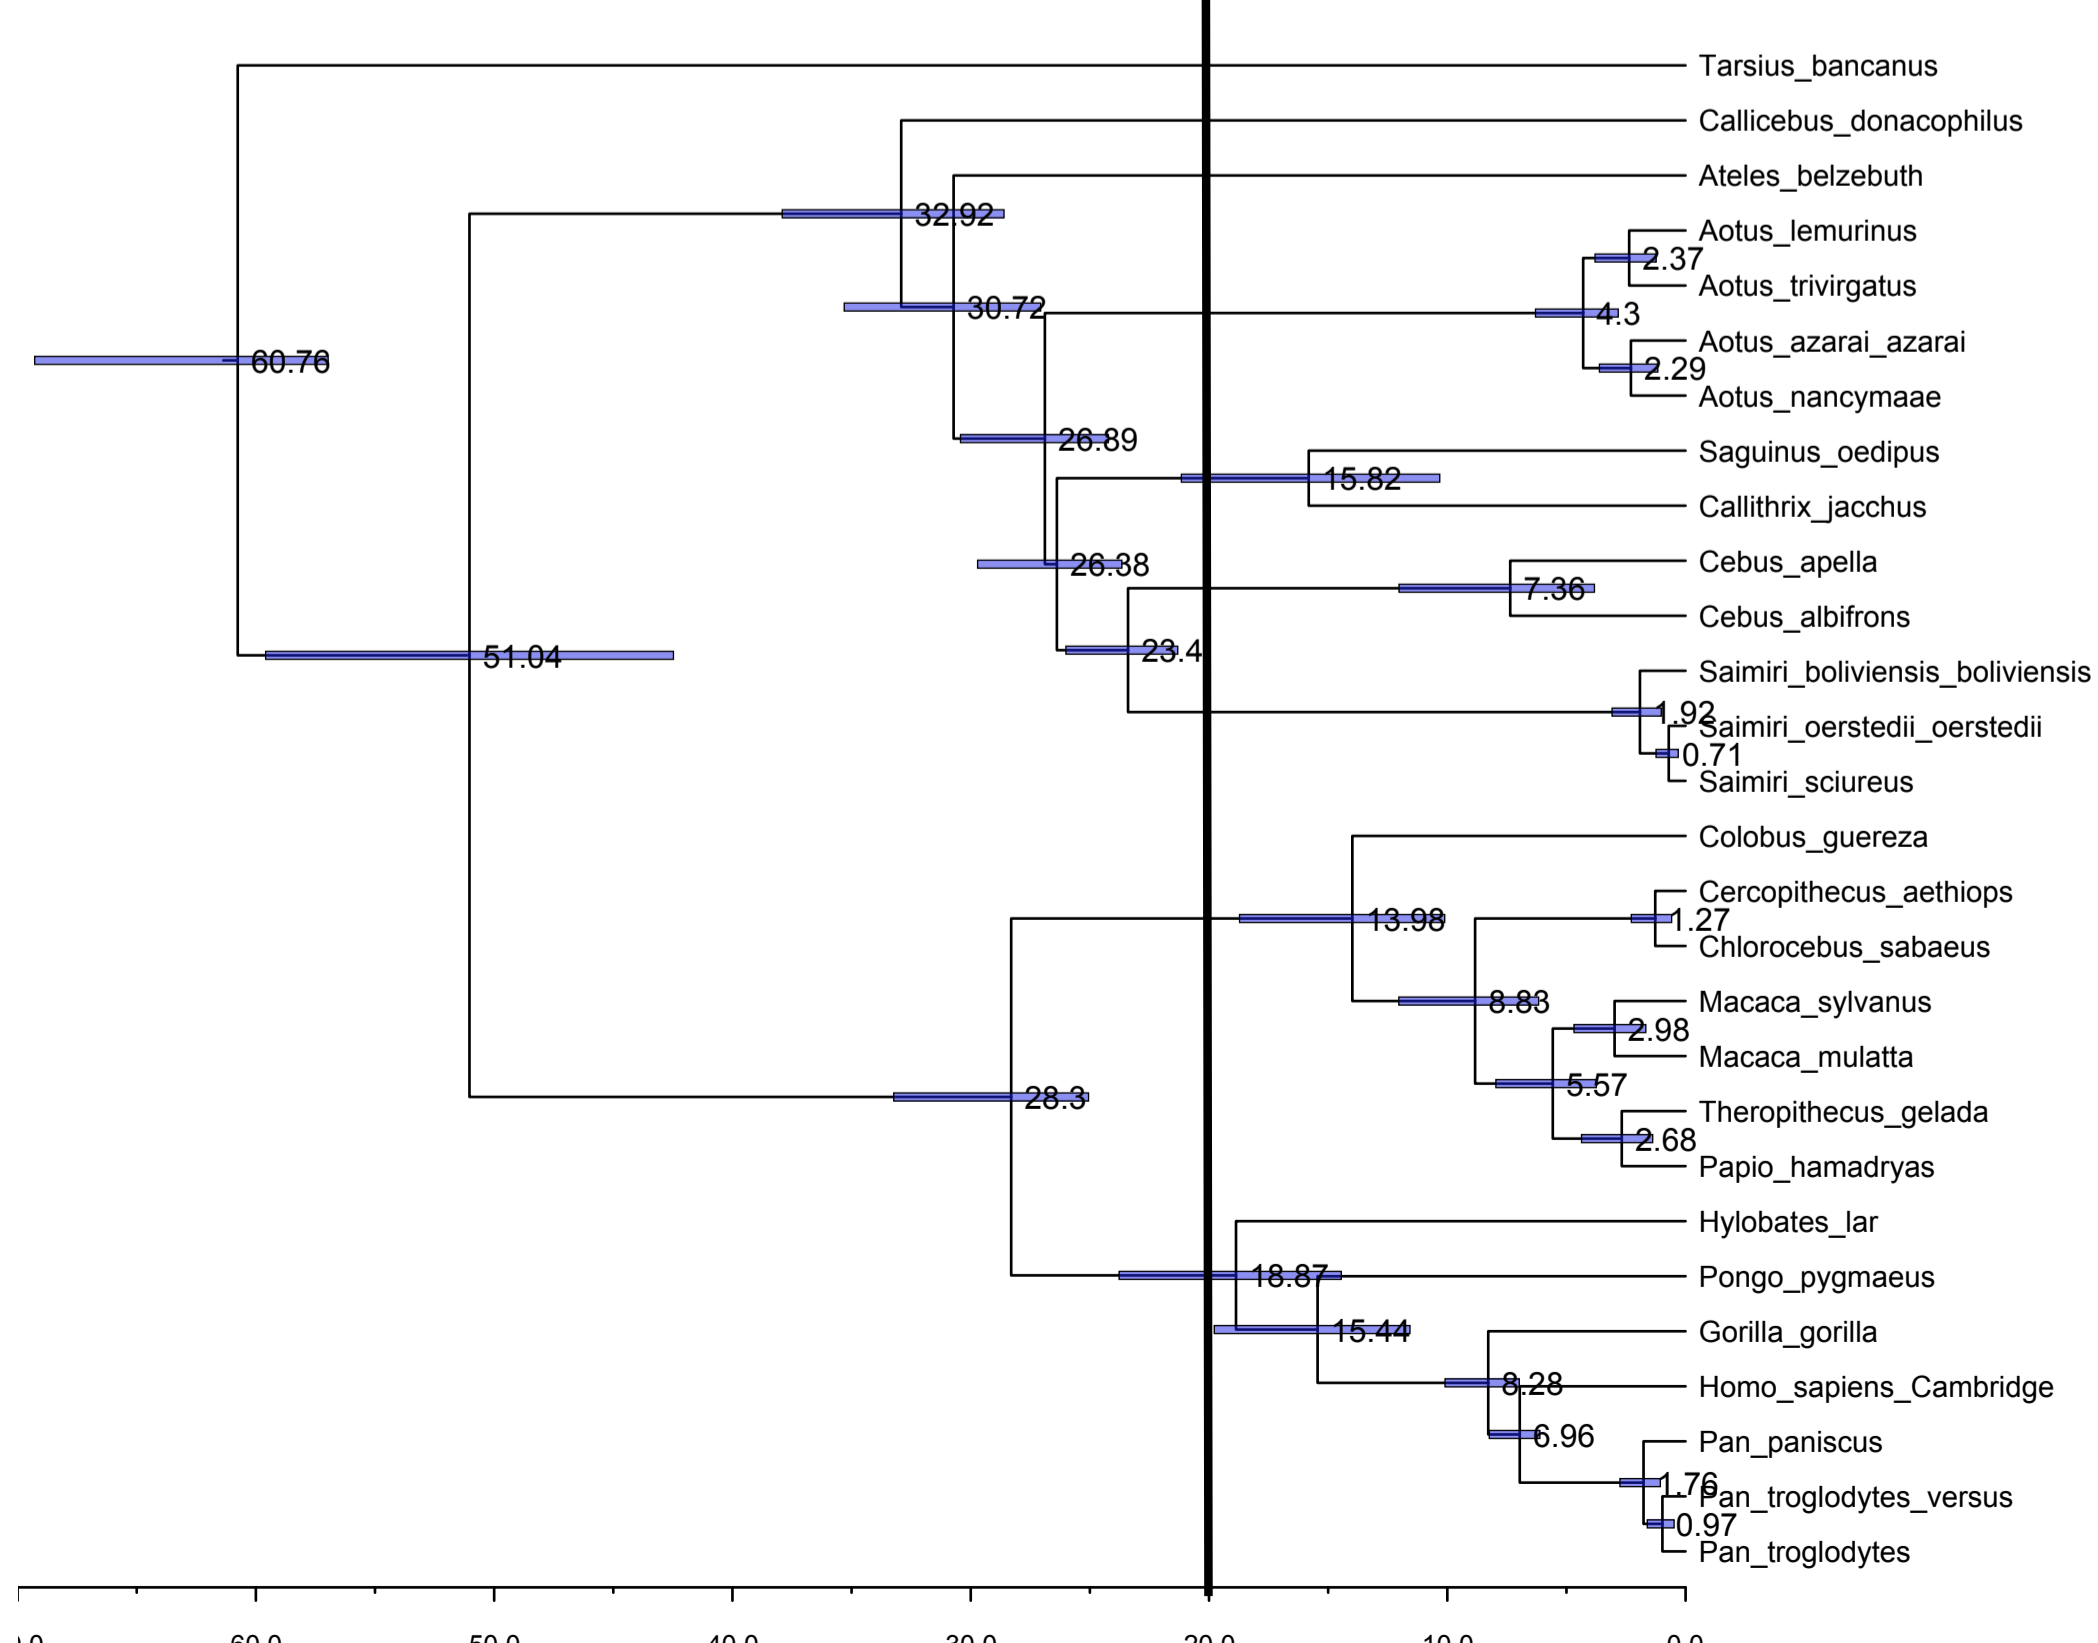

Hip 3

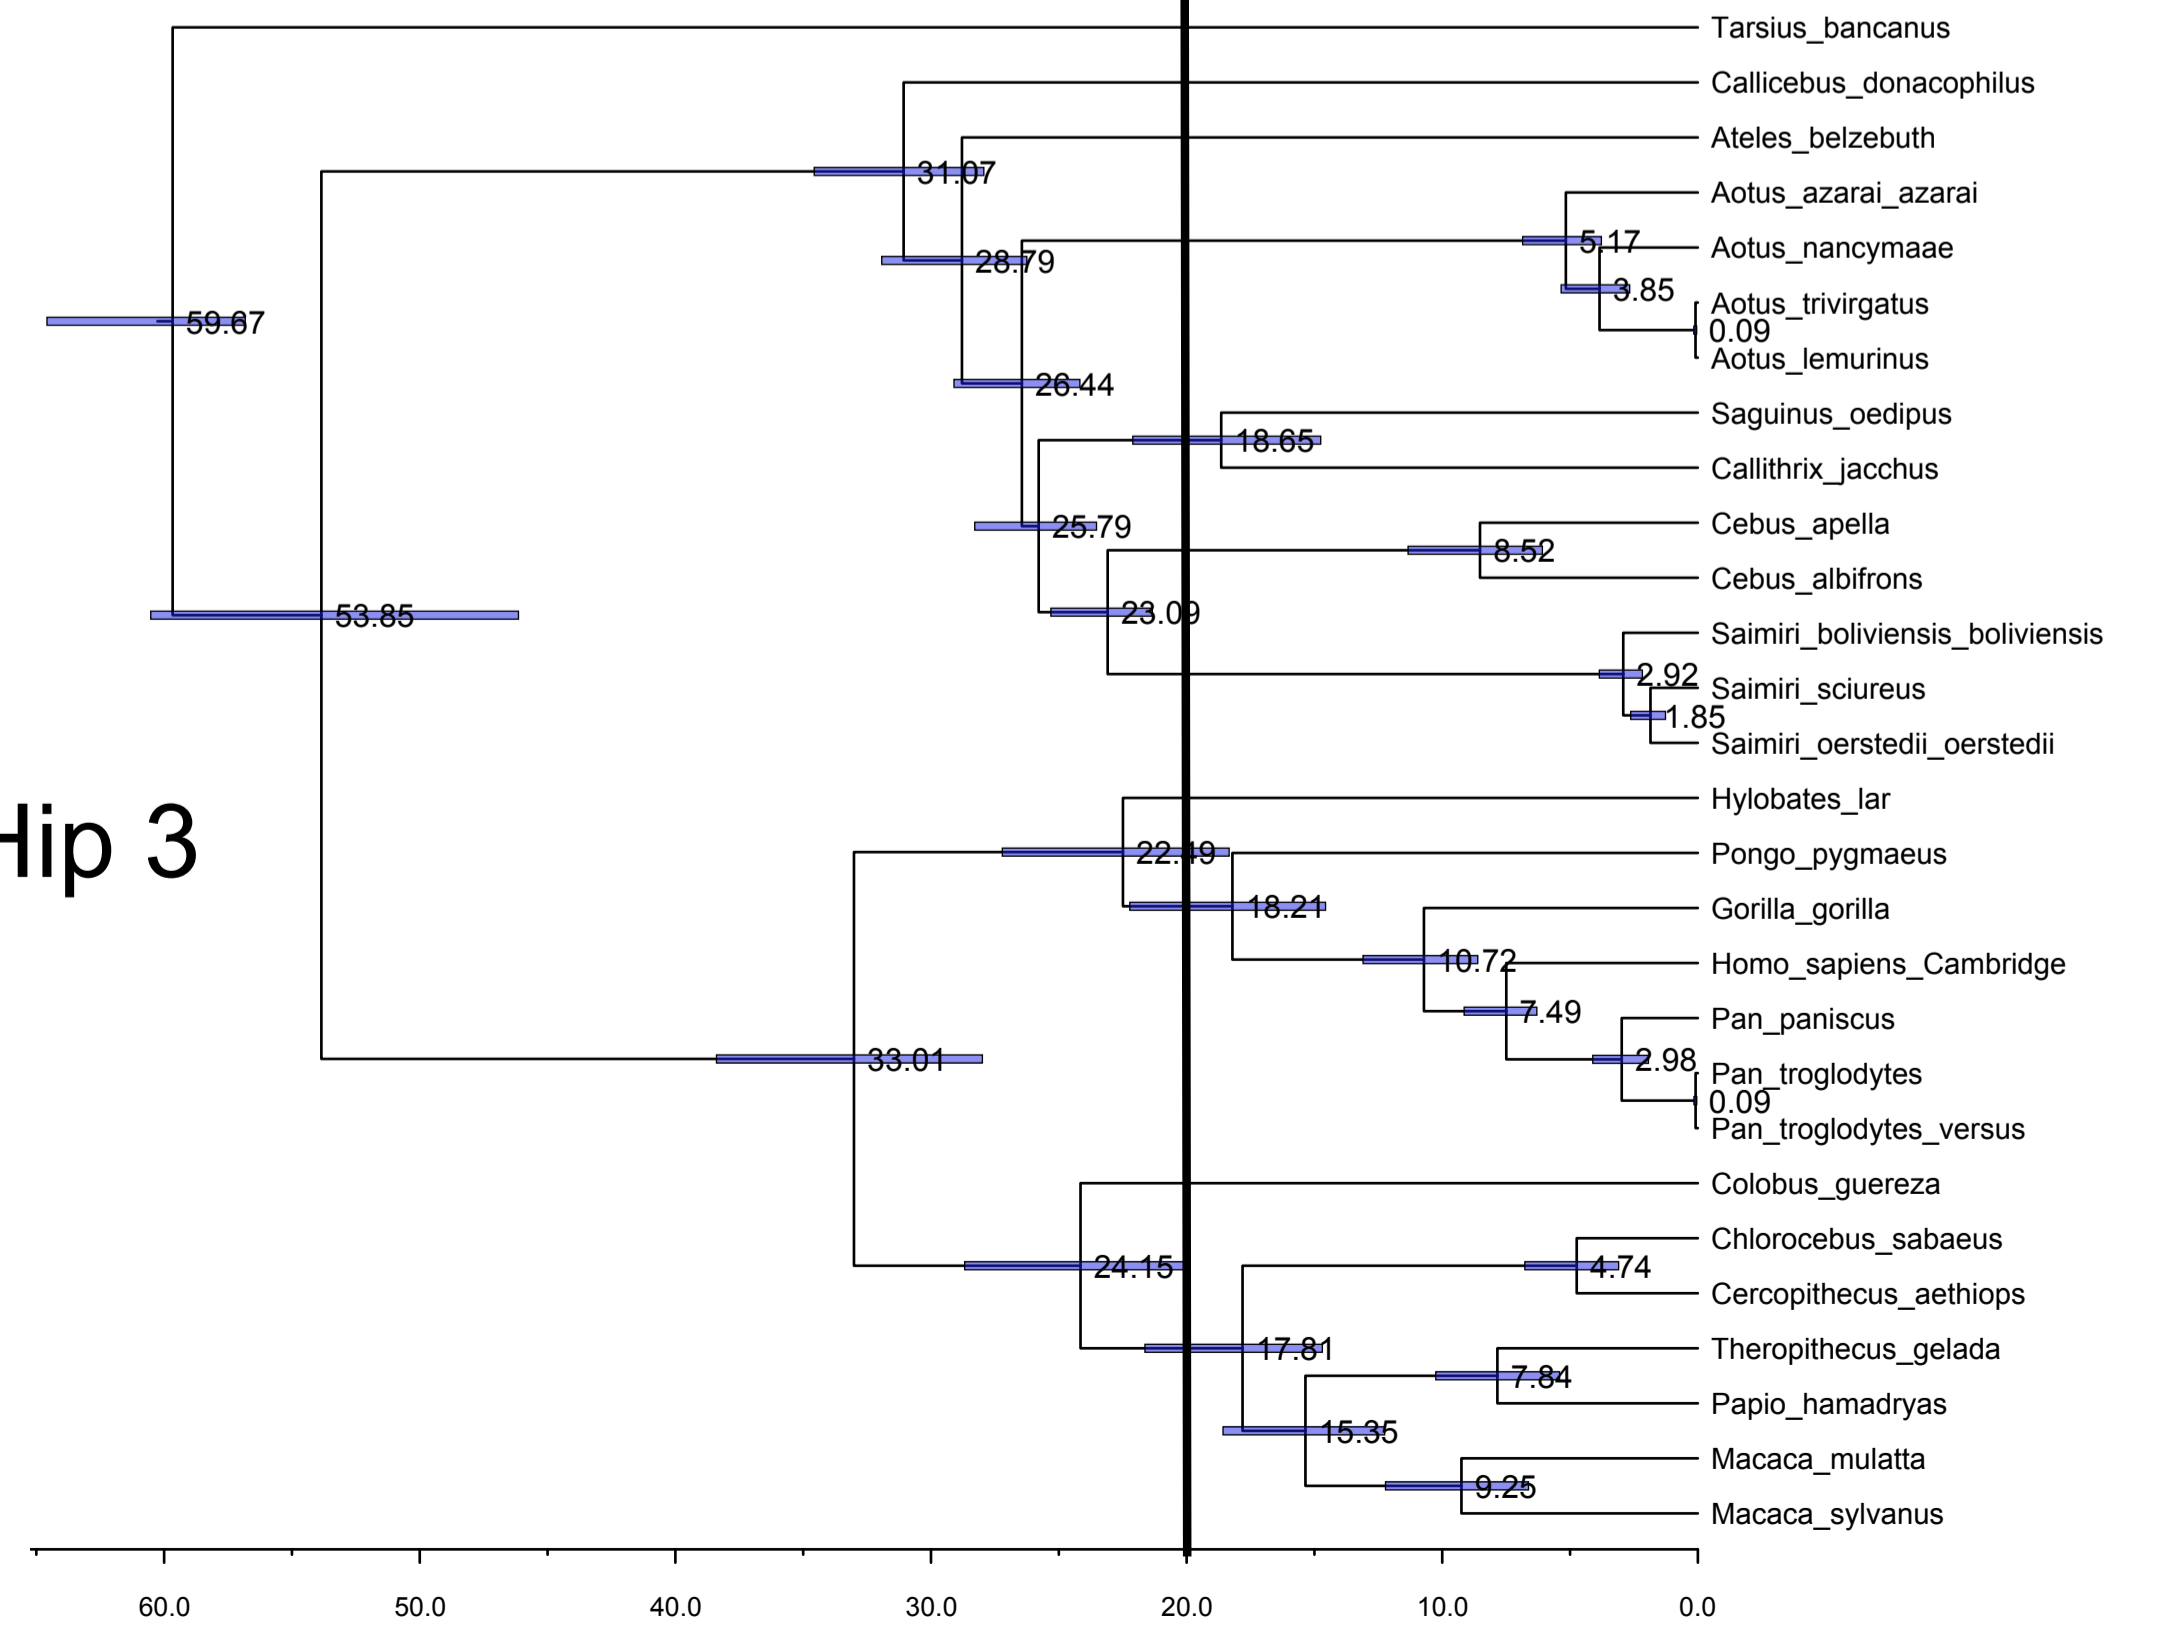

Supplement: pone.0068029.s001.pdf [file pone.0068029.s001.pdf]
