# Supplementary material for: Divergence Times and the Evolutionary Radiation of New World Monkeys (Platyrrhini, Primates): An Analysis of Fossil and Molecular Data
Source: PubMed Central journal article supplement (PMC3694915; doi:10.1371/journal.pone.0068029), 2013-06-27
Supplement: pone.0068029.s004.pdf [file pone.0068029.s004.pdf]

# Nuclear

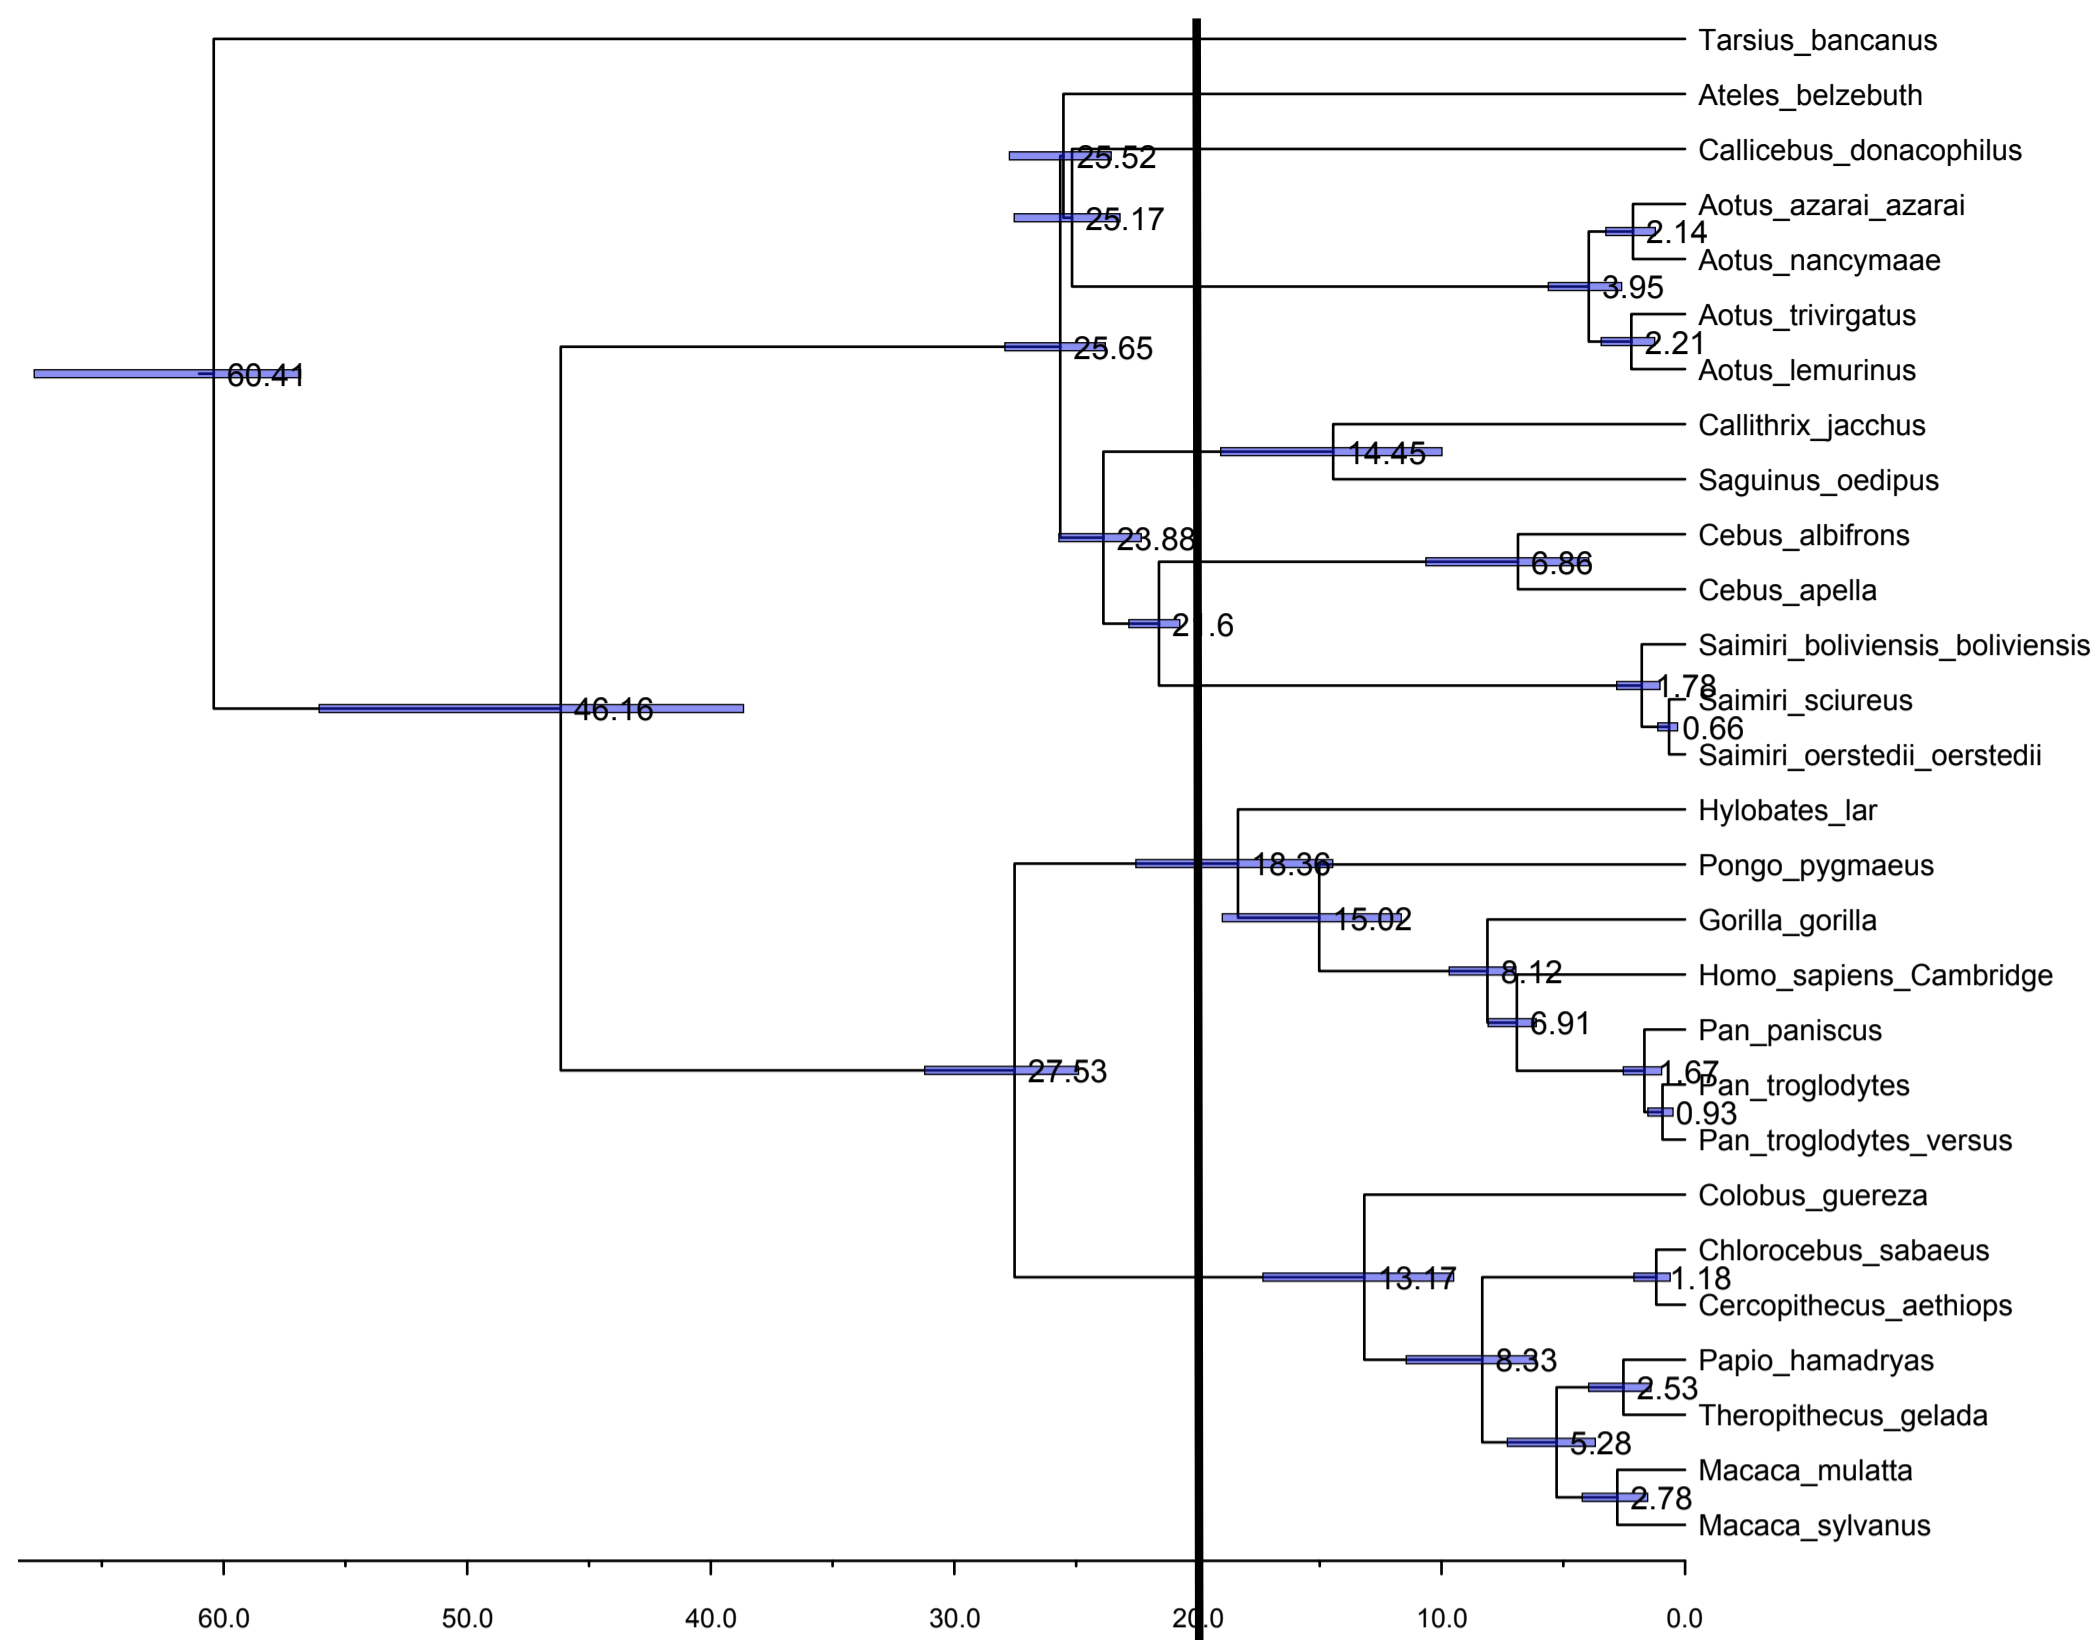

# mtDNA

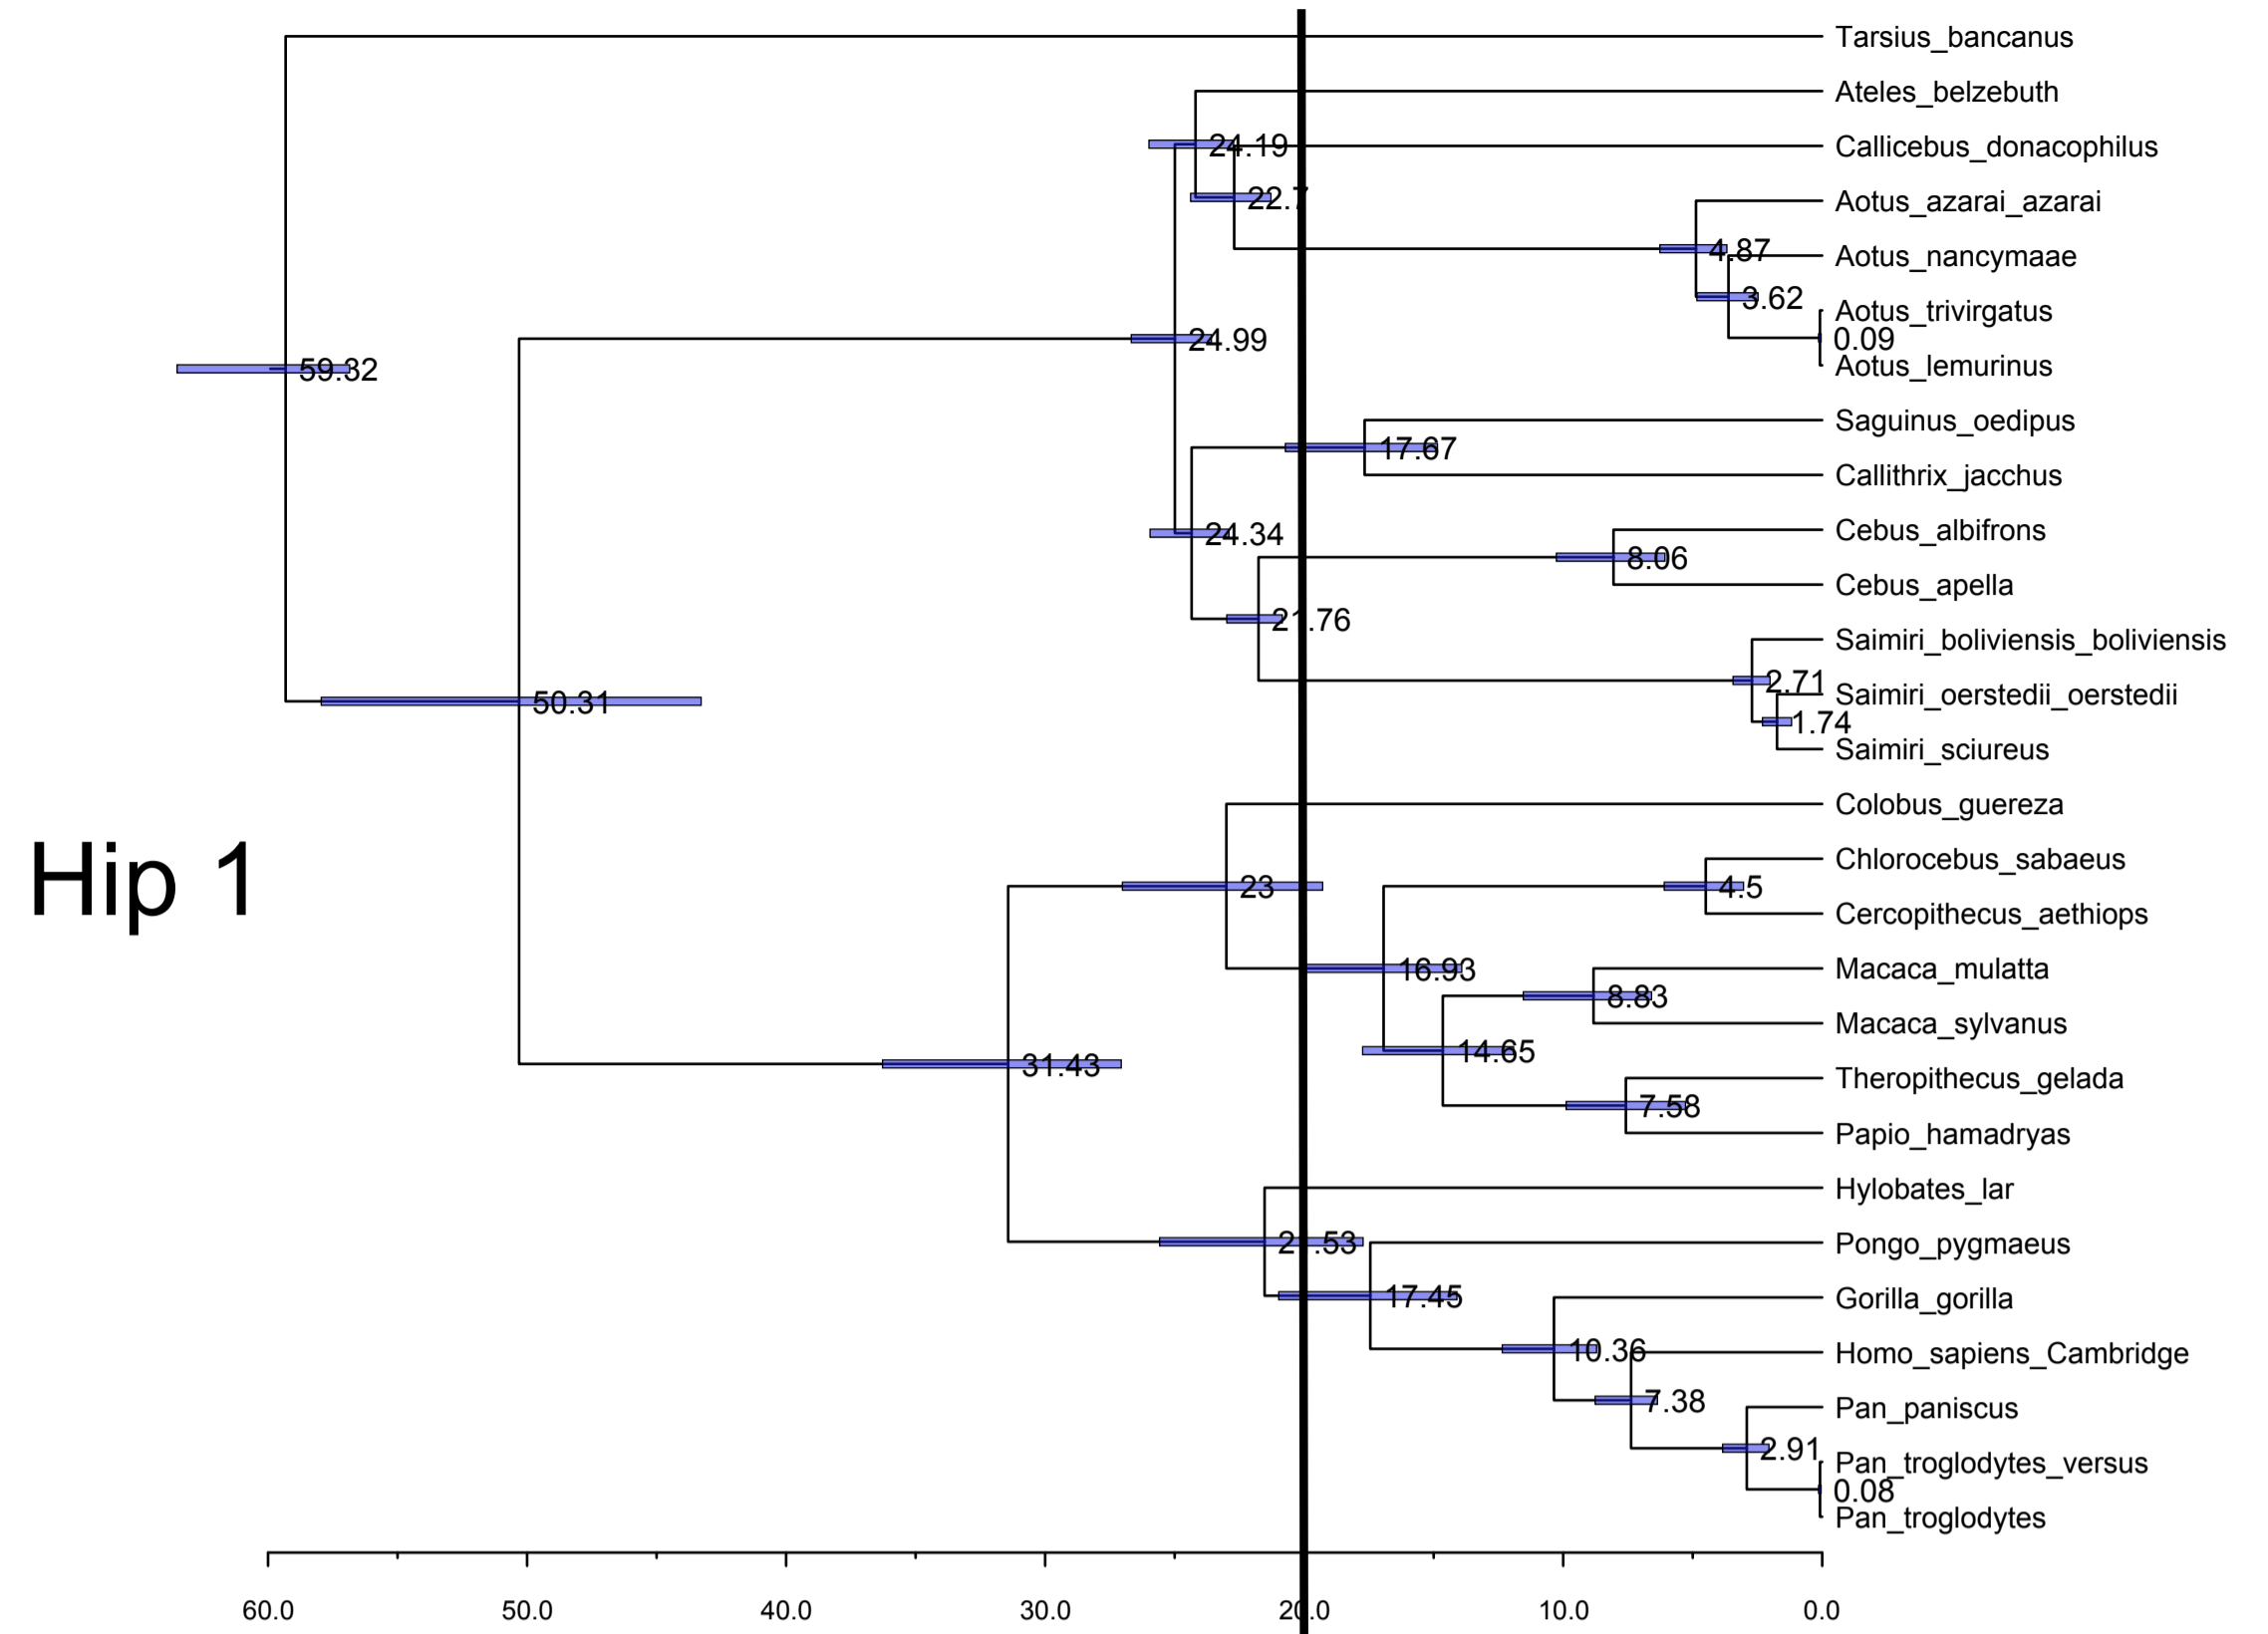

## Hip 1

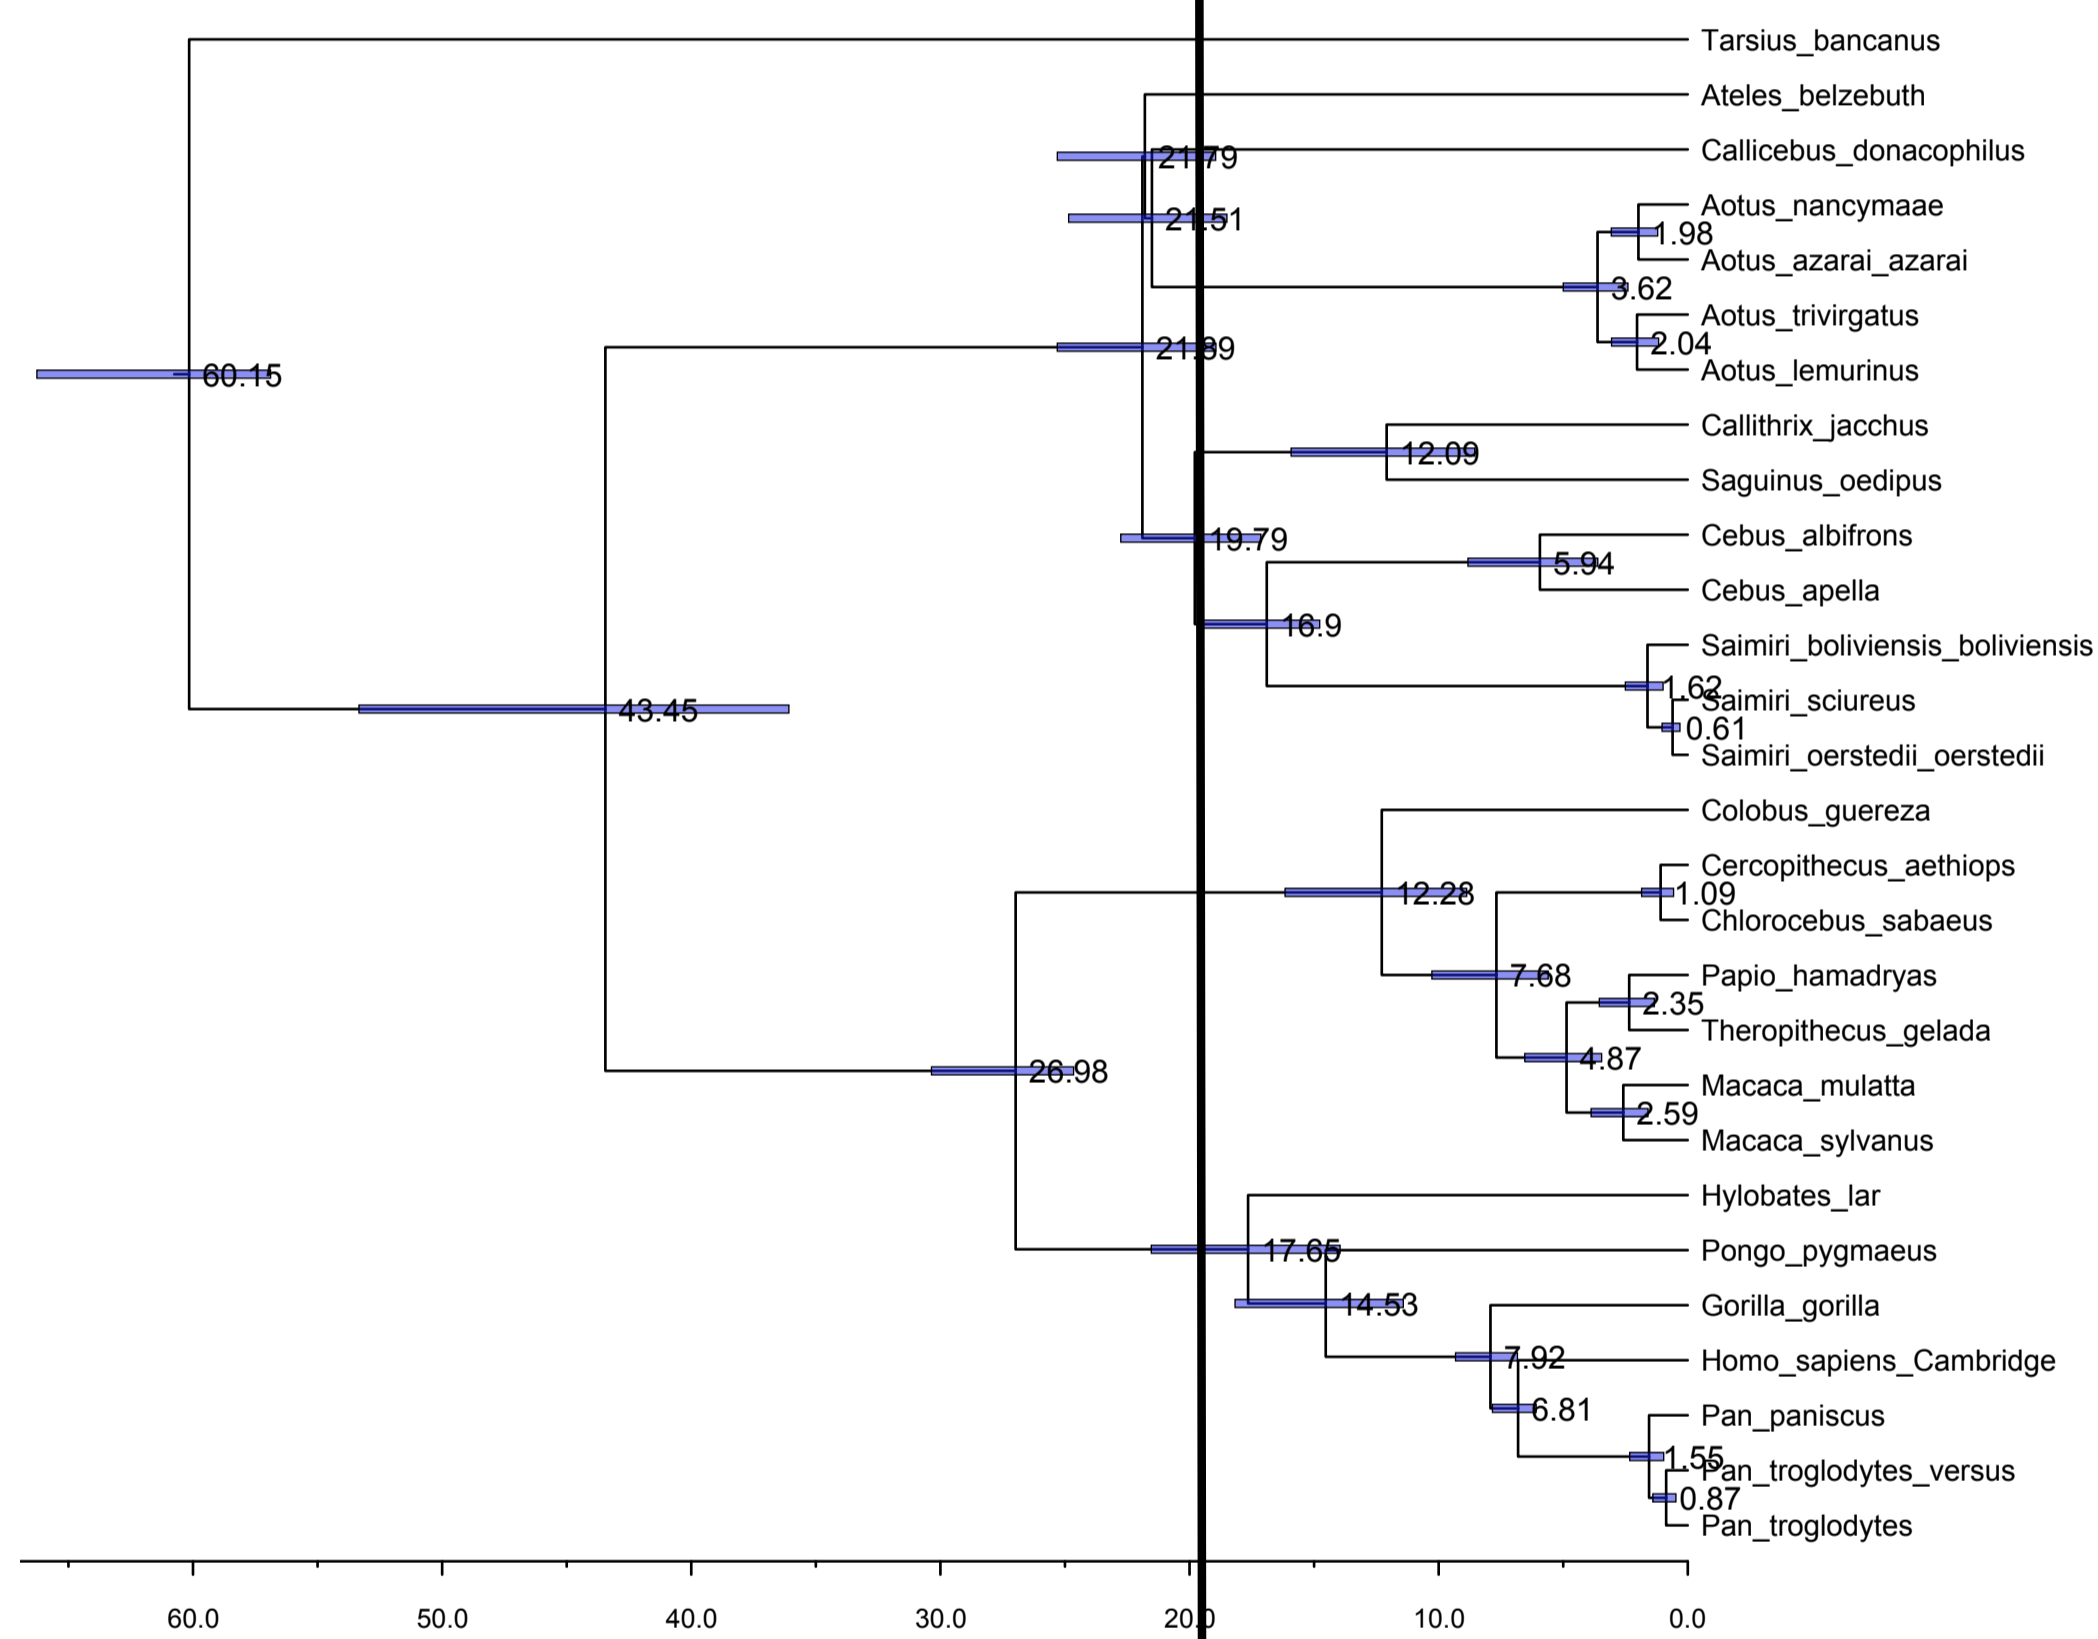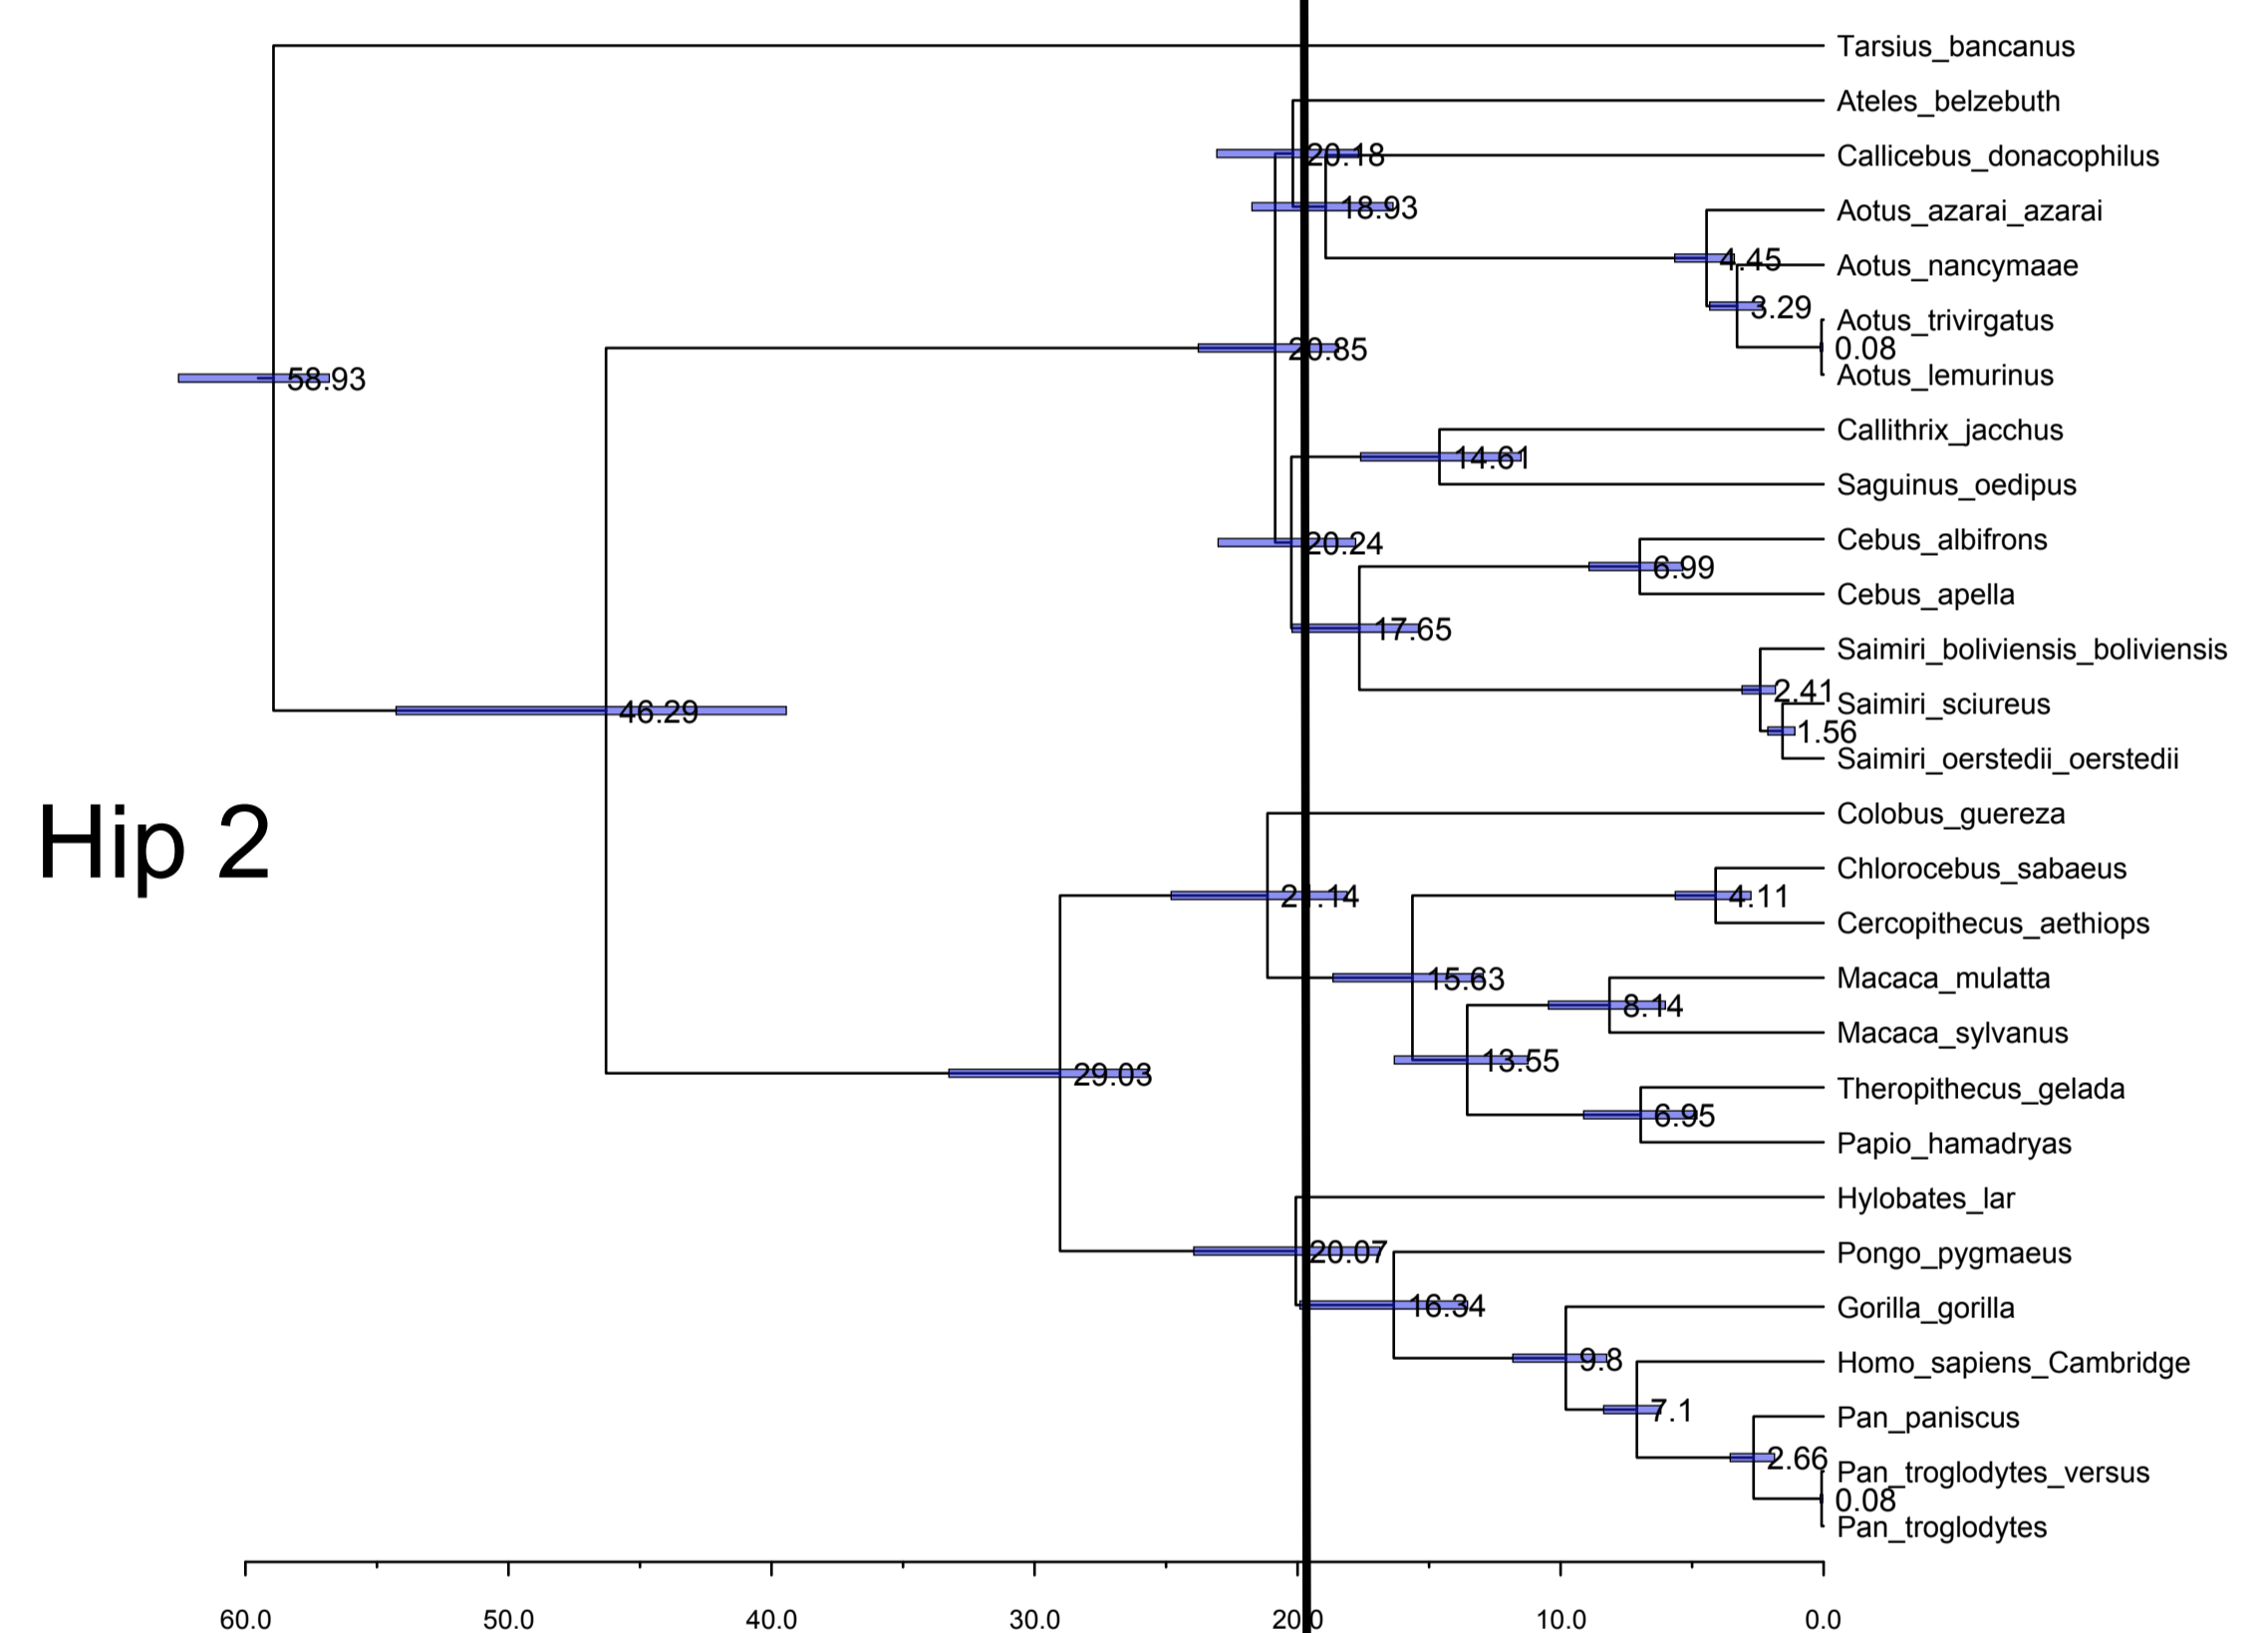

## Hip 2

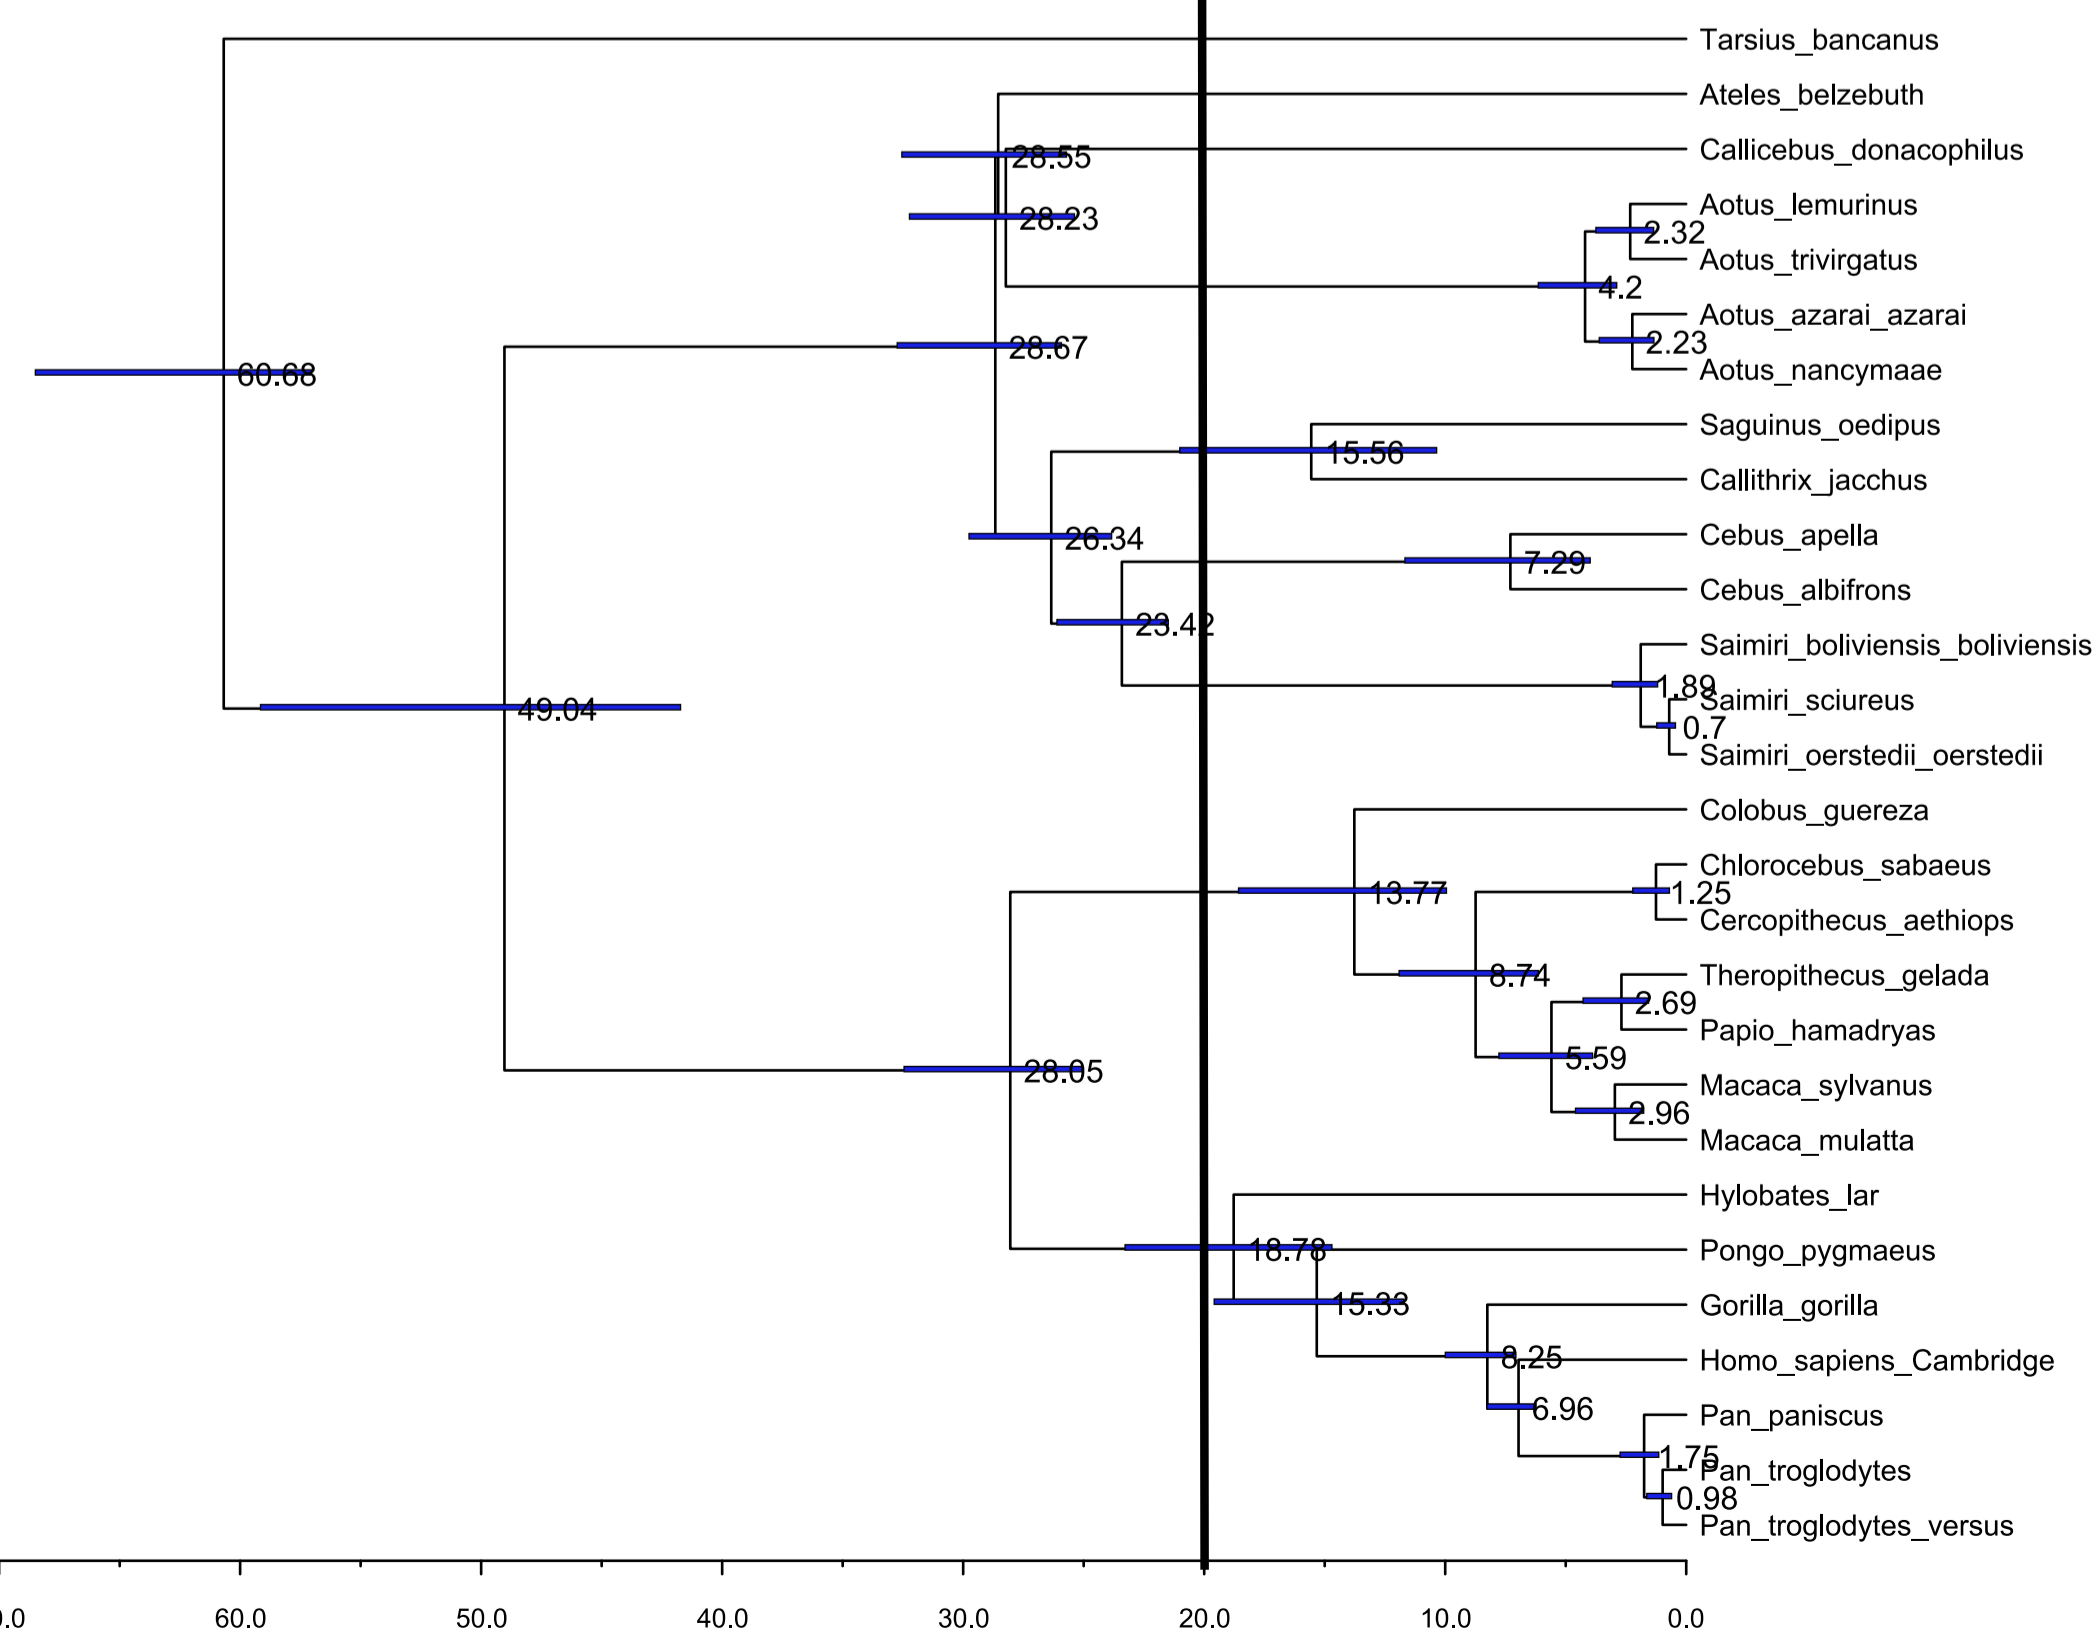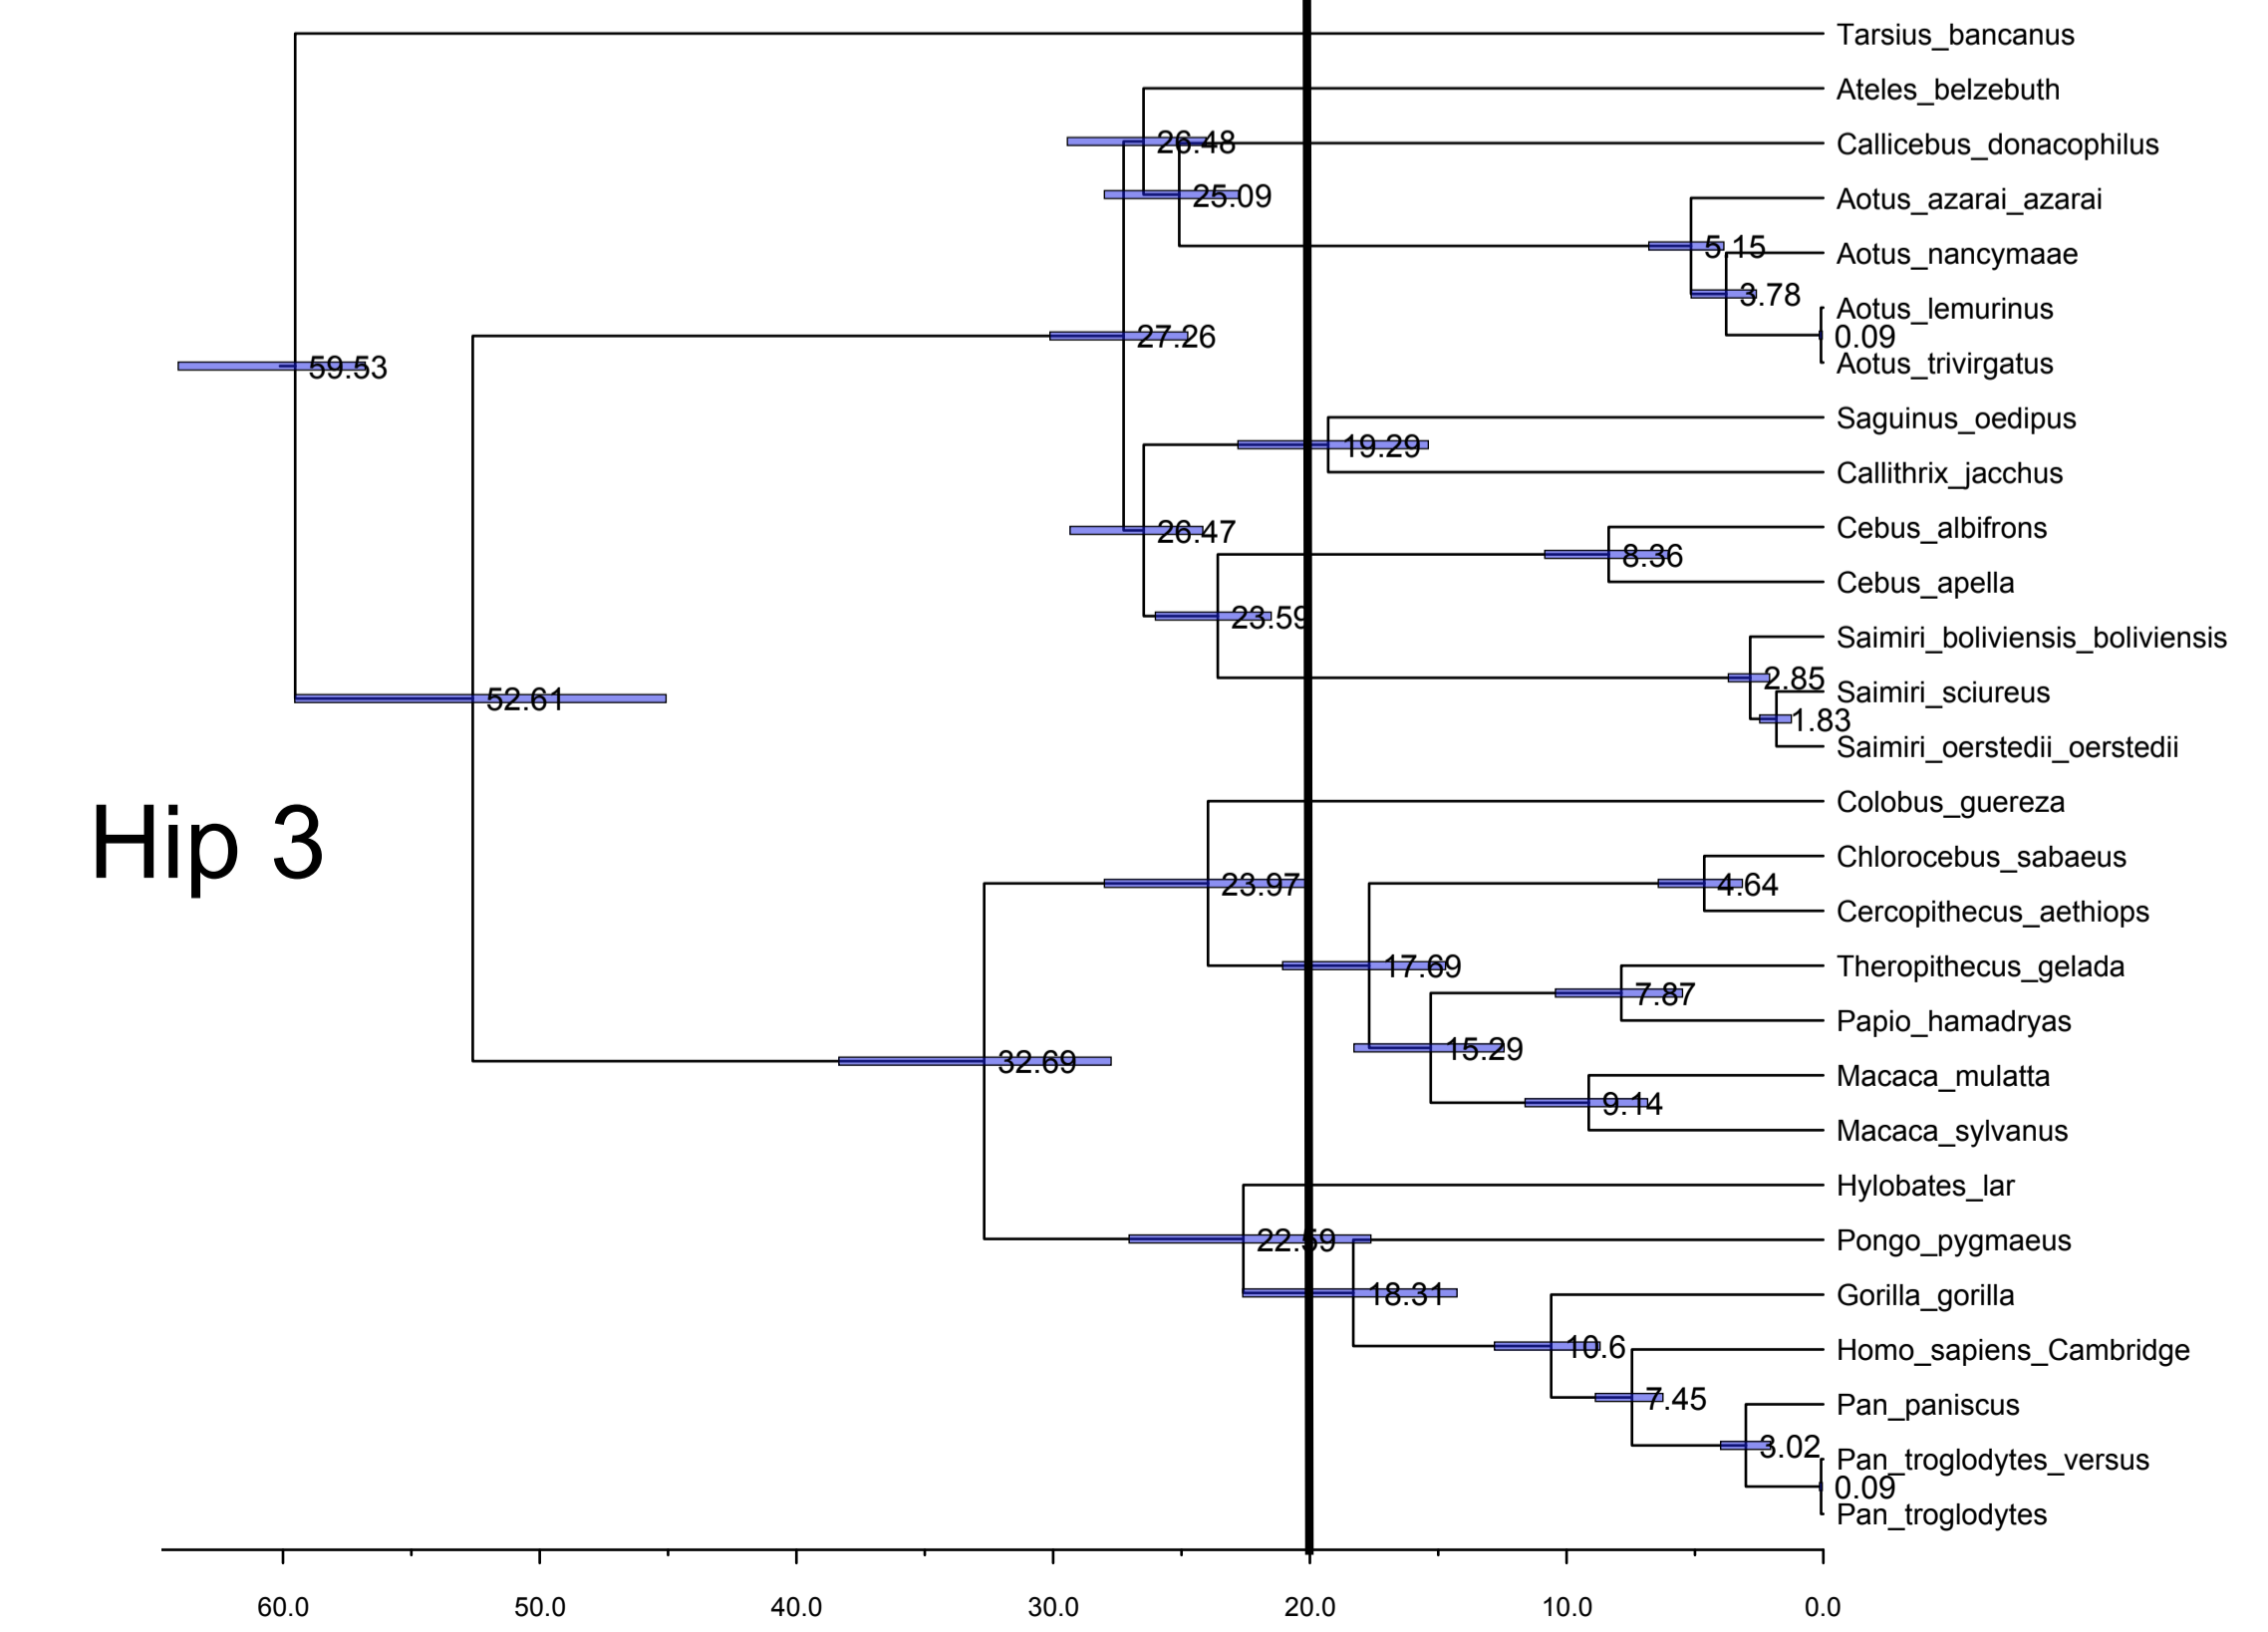

## Hip 3

Patagonian  
Fossils

Patagonian  
Fossils
