# Supplementary material for: Divergence Times and the Evolutionary Radiation of New World Monkeys (Platyrrhini, Primates): An Analysis of Fossil and Molecular Data
Source: PubMed Central journal article supplement (PMC3694915; doi:10.1371/journal.pone.0068029), 2013-06-27
Supplement: pone.0068029.s006.pdf [file pone.0068029.s006.pdf]

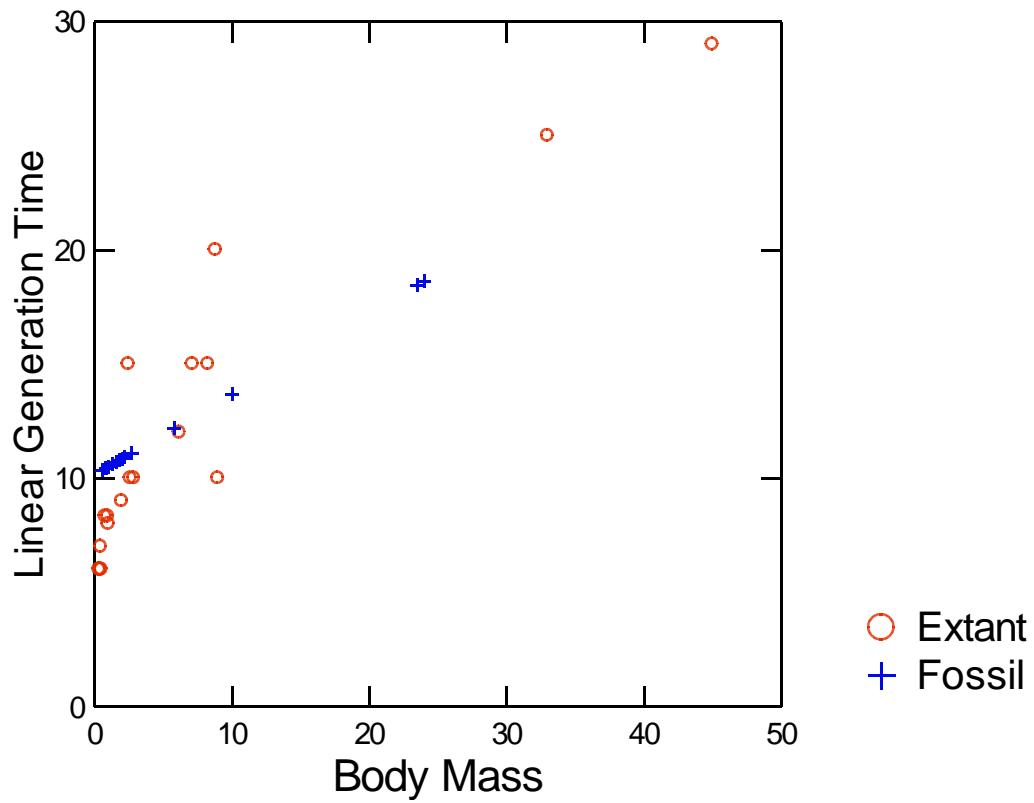

**Figure S6 Linear regression fit.** Plot showing body mass and generation time for extant species (red symbols), and body mass and imputed generation time for fossil taxa (blue symbols) using a linear regression (OLS) fit.
