# Supplementary material for: Divergence Times and the Evolutionary Radiation of New World Monkeys (Platyrrhini, Primates): An Analysis of Fossil and Molecular Data
Source: PubMed Central journal article supplement (PMC3694915; doi:10.1371/journal.pone.0068029), 2013-06-27
Supplement: pone.0068029.s008.pdf [file pone.0068029.s008.pdf]

**Table S1 OLS results.** OLS Regression results for extant taxa

**Regression Coefficients**

| <b>Effect</b> | <b>Coefficient</b> | <b>Standard Error</b> | <b>Std. Coefficient</b> | <b>Tolerance</b> | <b>t</b> | <b>P-value</b> |
|---------------|--------------------|-----------------------|-------------------------|------------------|----------|----------------|
| CONSTANT      | 8.559              | 0.799                 | 0.000                   | .                | 10.714   | 0.000          |
| Body Mass     | 0.000              | 0.000                 | 0.907                   | 1000             | 8.613    | 0.000          |

F-ratio: 74.178; P-value: 0.000

R: 0.907; Squared R: 0.823; Adjusted Squared R: 0.811
